# Supplementary material for: Dynamic Rigidity Changes Enable Rapid Cell Migration on Soft Substrates
Source: Research Square preprint supplement (doi:10.21203/rs.3.rs-5225113/v1), 2025-08-19
Supplement: Supplementary file 2 [file 54b3e66e27f7f455e012fdb0.docx]

| 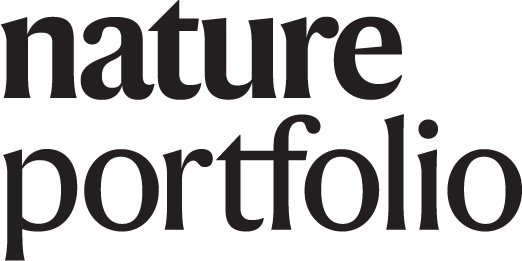 |  |
| --- | --- |

| **Author Checklist** | Manuscript Number: |
| --- | --- |
|  | NCOMMS-24-74023B |
|  | ______________________________ |
| **Please check the items below carefully and add a response in each row of the table to indicate the changes that you have made.** |  |
|  |  |
|  |  |
|  |  |
| **Abstract** |  |
| Our Guidance | Your response |
| The abstract — which should be roughly 150 words long and contain no references — should serve both as a general introduction to the topic and a non-technical summary of your main results and their implications. It should contain a brief account of the background and rationale of the work, followed by a statement of the main conclusions introduced by the phrase 'Here we show' or some equivalent phrase. Because we hope that researchers in a wide range of disciplines will be interested in your work, the abstract should be as accessible as possible, explaining essential but specialized terms concisely. We encourage you to show your abstract to colleagues outside of your direct field of expertise to uncover any problematic concepts. | We appreciate the guidance and can confirm that our abstract meets all the requirements outlined. |
| When discussing the current work in the abstract, please use the present tense. | We have confirmed that our abstract uses the present tense when discussing our findings, in accordance with your guidance. We believe the abstract meets all specified requirements. |
|  |  |
| **Author information** |  |
| Our guidance: | Your response: |
| Please review your complete author list to verify that it is complete and accurate. We ask that you consult with your coauthors to ensure that all names, affiliations, and titles are represented correctly. Note that if any authors are added or removed after this point then all authors will be requested to provide approval documentation that could potentially delay the production of your paper. | In accordance with your guidance, we have reviewed all author details with the entire team and have updated all names, affiliations, and titles for accuracy.  On behalf of all authors, we propose a minor adjustment to the author order, **switching the positions of corresponding authors Prof. Qiang Wei and Prof. Yi Cao, to accurately reflect a shift in their nearly equal contributions that arose during the revision process. For clarity, the manuscript file in this submission does not yet reflect this proposed change and maintains the current author order.**  Prof. Yi Cao and Prof. Qiang Wei contributed nearly equally to this work. Initially, Prof. Cao was listed last due to a slightly greater contribution. However, after accounting for the additional work done during the revision, Prof. Wei's contribution now slightly outweighs. We would therefore like to switch their order in the author list, while keeping both as corresponding authors.  We confirm that no other authors have been added, removed, or reordered. This proposed change has the full agreement of all co-authors.  Most importantly, we understand that policies on authorship changes at this stage are strict. **Should this adjustment not be permissible, please be assured that all authors have unanimously agreed to maintain the author order as currently submitted to ensure a timely publication.** |
| Ensure affiliations are appropriately labeled and featured sequentially and in ascending order (1,2,3,... or a,b,c...). Please ensure all corresponding authors are marked with a specific symbol and include their emails. Similarly, if you have “equally contributing” or “joint supervision” authors, use a specific symbol to mark them and not a number. | We confirm that our author list is formatted per your guidelines: affiliations are numbered sequentially, corresponding authors are marked with an asterisk (*) with their emails included, and equally contributing authors are marked with a hash symbol (#). |
| Please ensure affiliations are appropriately labeled, with a single department or institute in each, and featured sequentially and in order. Affiliation 1 must be the first affiliation used, then 2, 3, 4 and so on. That means, for example, a superscript 3 must *not* appear before a superscript 2 has already appeared in the author list. Please see this article as an example: https://www.nature.com/articles/s41467-020-16621-x.pdf | We confirm our affiliations fully meet all specified requirements regarding labeling, sequential numbering, and correct order. |
| Please ensure all corresponding authors are marked with a specific symbol and include their emails. | We confirm that our affiliations fully meet all specified requirements regarding labeling, sequential numbering, and correct order, as outlined in your guidance. |
|  |  |
| **Article structure** |  |
| Our guidance: | Your response: |
| We can accommodate up to 10 display items (Figures or Tables) in the main article. Each Figure and Table must fit easily within an A4 page (210 x 297 mm). Please ensure that the number and size of your Figures and Tables fulfil these requirements to avoid any delay in the acceptance of your article. | We confirm our manuscript meets all display item requirements, with 6 A4-sized figures and no tables. |
| Ensure main Figures are uploaded as separate individual files. Each figure file must contain all intended panels labelled and displayed as intended and fit entirely on a single page. Do NOT include legends within the figure files, as these must be in the main manuscript.  Supplementary Figures must be all contained in the Supplementary Information PDF and do NOT need to be uploaded separately. | We confirm all figures are fully prepared per your guidelines: main figures are provided as separate files with all panels, while supplementary figures are contained within the SI PDF. All legends are included in the main manuscript. |
| **Please comply with the following requests:** |  |
| *Please submit your Main Text as a Word document; this should contain no figures, only text* | *As requested, the main text has been submitted as a Word document that contains text only and no embedded figures.* |
| *Please submit your Main Figures as individual files (.PSD, .AI, .EPC, .TIFF, .JPG, .PDF, .PS, .GIF, .PPT, .PNG, .BMP, .VSD, .CDX, or .EMF)* | *All main figures uploaded separately in approved formats.* |
| *Please don’t add any titles or legends to the Main Figure files (ie. "Figure 1")* | *No titles or legends embedded in main figure files.* |
| *Please submit your Supplementary Figures in a single PDF file (figure, legend, figure, legend, etc.) labeled "Supplementary Information"* | *We confirm that all supplementary figures have been compiled into a single 'Supplementary Information' PDF, as required.* |
| *When scaled to fit our article template, text and detail in your Figures may be too small to be legible. Please provide your final figures at article scale and as a guideline, ensure that text is not smaller than 5 pts.* | *We can confirm that all our figures have been scaled to their final size for publication, and all internal text is 5 pts or larger, in accordance with your guidelines.* |
| *We currently don’t embed movies into the Nature Communications Article website. Readers will have to download your movies to watch them, so consider including a title and some text within the movie, to provide context and make them standalone items* | *Titles and explanatory text have been incorporated into each movie in a manner that preserves informational integrity without compromising viewer clarity.* |
| *If any of your figures include a BioRender schematic, please upload a copy of your license with your submission. The license is available at https://help.biorender.com/hc/en-gb/articles/21282341238045-Publishing-in-Open-Access-Journals -- Please follow the instructions there about how to cite BioRender in the appropriate figure legends.* | *We confirm that a valid BioRender license has been obtained and submitted with this work. All relevant figure legends now properly cite BioRender as required.* |
| **Please ensure your main manuscript file includes the following sections, in this order:** |  |
| *Title Author list Affiliations Abstract Introduction Results Discussion  Methods Data Availability Code Availability  References Acknowledgements Author Contributions Statement Competing Interests Statement Figure Legends/Captions (for main text figures only)* | *We have revised our main manuscript file to ensure that all sections are now present and in the correct order as requested.* |
| Please supply your Supplementary Figures and their legends in a single PDF file labeled Supplementary Information (figure, legend, figure, legend, etc). We do not edit Supplementary Information files; they will be uploaded with the published article as they are submitted with the final version of your manuscript. Any tracked changes should be removed from the file and the file should be provided as a PDF file. Supplementary Figures should not be provided as separate files and their legends should not be in the Main Text file. | We have uploaded the Supplementary Information as a single PDF file containing all supplementary figures and legends, formatted according to your guidance. |
| Please supply a single Source Data Excel file for all data presented in graphs within the Figures. | We have prepared and submitted a single Source Data Excel file that contains all the underlying data for the graphs in our figures, as requested. |
| Please ensure that uncropped scans of all blots and gels in all figures are supplied as images in the Source Data file. Note that the blots you currently supply in Fig S31 are cropped and are inadequate. The point of uncropped blots is to show the loading ladder and the top and bottom of the loading lane to show any non-specific bands that might be there. Please show uncropped images of the whole gel. | We sincerely thank you for emphasizing the critical importance of supplying uncropped, whole-gel/membrane scans and for pointing out the inadequacy of the images originally in Fig S31.  Unfortunately, the precise uncropped membranes corresponding to the specific representative Western blot images currently shown in the manuscript figures are unavailable. This is because those membranes were physically cut into strips during our experiments to enable simultaneous probing of multiple proteins within the same batch, a practice used to maximize consistency for the presented data.  However, our analyses were performed in multiple independent experimental batches. For each protein, we have data from parallel experiments where the full, intact membranes were retained. These alternative batches provide robustly representative results that fully support the scientific conclusions in the manuscript.  Therefore, to fully address the policy requirement while retaining the original representative images in our figures, we have now updated Figure S31 to also include the uncropped, whole-membrane scans from these parallel, representative experiments. Additionally, we have supplied all these original, uncropped scans in the Source Data file. These uncropped scans serve as the required supporting evidence for the cropped blots shown in the figures.  We believe this approach provides full transparency and comprehensively fulfills the requirement for whole, uncropped membrane images as per the journal's guidelines. |
| Within the Source Data file, the relevant raw data from each figure or table (in the main manuscript and in the Supplementary Information) should be represented by a single sheet in an Excel document, or a single .txt file or other file type in a zipped folder. An example of the Source Data file is available demonstrating the correct format: https://www.nature.com/documents/ncomms-example-source-data.xlsx The file should be labelled 'Source Data', with the title and a brief description included in your response here, and should be mentioned in all relevant figure legends using the template text below: 'Source data are provided as a Source Data file.' A reference to the source data file should be added in the 'Data Availability' section, using the text: Source data are provided with this paper. | In accordance with your guidance, we have prepared and uploaded the Source Data file. Please find its details below:  Title: Source Data  Description: This file contains the underlying numerical data used to generate the graphs, charts, and statistical analyses presented in the main manuscript and supplementary information figures. Each worksheet corresponds to a specific figure panel.  Furthermore, we have updated the manuscript as follows:  All relevant figure legends now include the phrase: "Source data are provided as a Source Data file."  The Data Availability statement now includes the phrase: "Source data are provided with this paper." |
|  |  |
| **Main text** |  |
| Our Guidance | Your response |
| Please refrain from using words such as 'new'/'novel'/'first'/'previously unidentified' when referring to the scientific findings. Please also remove exaggerated language such as 'striking'/’surprising’/’remarkably’/'dramatic', etc. | We have reviewed our manuscript and can confirm that it adheres to your guidelines regarding objective scientific language, avoiding words that assert novelty or use subjective descriptions. |
| A full Methods section, divided into subsections and subheadings, must be provided in the main manuscript. There is no word limit to this section. | We have reviewed our manuscript and can confirm that the Methods section is provided in the main text and is organized into subsections and subheadings, as required. |
| Please do not use italics, bold font, underlining or speech marks/quotation marks except in headings unless required for technical terms (in both the main text and the display items). | We have reviewed our manuscript's formatting and can confirm that we have followed the journal's guidelines regarding the use of italics, bold font, and other text stylings. |
| Please make sure that mathematical terms throughout your manuscript and Supplementary Information (including in figures, figure axes, and legends) conform strictly to the following guidelines. Equations must be supplied in editable format, and not as images. Scalar variables (e.g. x, V, χ) must be typeset in italic, whereas multi-letter variables and functions (e.g. log) must be formatted in roman. Vectors (such as the wavevector k or the magnetic field vector B) must be typeset in bold without italics. | We have reviewed our manuscript and can confirm that all mathematical terms and equations have been formatted according to the journal's guidelines for scalars, vectors, and functions. |
|  |  |
| **Figures and Tables** |  |
| Our guidance: | Your response: |
| Please see the guidelines linked below for detailed instructions about how your figures should be prepared. Following these instructions will reduce the chances of delays should we need to request replacement artwork from you at a later stage. | We confirm all figures and legends have been carefully revised to fully comply with Nature's final artwork guidelines and all instructions provided below. |
| <https://www.nature.com/documents/NRJs-guide-to-preparing-final-artwork.pdf> |  |
| Please ensure that data presented in a plot, chart or other visual representation format shows data distribution clearly (e.g. dot plots, box-and-whisker plots, violin plots). When using bar charts, please overlay the corresponding data points (as dot plots) whenever possible and always for n ≤ 10. All box-plot elements (center line, limits, whiskers, points) should be defined in the legends accompanied by precise n numbers. | We appreciate the guidance on ensuring our data visualizations clearly show data distribution. In response, we have revised the specified figures. In Figure 3g (renumbered from previous Figure 3f to maintain sequential order, as per your policy), since the sample size is less than 10, we have updated the bar chart to include an overlay of all corresponding data points. Conversely, for Figure 3j, which has a large sample size, we have replaced the chart with a scatter plot for a more transparent representation. We have also applied this same logic systematically to all figures in the Supplementary Information. We are confident these changes are now fully compliant with your policy. |
| **Please note that data presentation has to be revised to comply with our policy in figure(s) 3f, j** |  |
| All error bars need to be defined in the legends (e.g. SD, SEM) together with a measure of centre (e.g. mean, median). For example, the legends should state something along the lines of “Data are presented as mean values +/- SEM” as appropriate. All box plots need to be defined in the legends in terms of minima, maxima, centre, bounds of box and whiskers and percentile. | We confirm that all relevant figure legends, including those you specifically noted, have been amended to explicitly define the error bar metrics and their corresponding measures of center, fully complying with the specified requirements. |
| **Please note that the error bars/error bands need to be defined in the legend(s) of figure(s) 1f, h, j; 2f; 3f, j, l  Please note that the measure of centre for the error bars/error bands needs to be defined in the legend(s) of figure(s) 5g; 6b** |  |
| The figure legends must indicate the statistical test used. Where appropriate, please indicate in the figure legends whether the statistical tests were one-sided or two-sided and whether adjustments were made for multiple comparisons. For null hypothesis testing, please indicate the test statistic (e.g. F, t, r) with confidence intervals, effect sizes, degrees of freedom and P values noted. Please provide the test results (e.g. P values) as exact values whenever possible and with confidence intervals noted. | We have carefully revised the figures and their legends including those you specifically noted, to comply with the journal's policy.  For direct reader access, the exact p-values have been added to the plots themselves. Furthermore, each corresponding legend now clearly states that the statistical analysis was performed using an unpaired, two-tailed Student's t-test and defines what the asterisks (*, **, etc.) represent.  We believe all legends now contain the necessary details to ensure clarity and reproducibility. |
| **Please indicate the statistical test used for data analysis and where appropriate, please specify whether it was one-sided or two-sided and whether adjustments were made for multiple comparisons, in the legend(s) of figure(s) 3b; 4b  Please indicate what */ **/ ***/ **** represents; if this represents p value(s), please indicate the statistical test used and where appropriate, specify whether it was one-sided or two-sided and whether adjustments were made for multiple comparisons and the exact p value in the legend(s) of figure(s) 1g; 2h; 3c, d, f, h; 4d, g; 5d; 6c, d, g  Please indicate what */ **/ ***/ **** represents; if this represents p value(s), please indicate the exact p value in the legend(s) of figure(s) 3b; 4b** |  |
| To ensure that your figures are accessible to color-blind readers, please use accessible color schemes. Red/green combinations should not be used for graphs, schematics, heat maps, or other data presentations. For microscopy images, please use greyscale pictures for each channel and/or replace any red/green image overlays with magenta/green. We refer you to https://www.ascb.org/diversity-equity-and-inclusion/how-to-make-scientific-figures-accessible-to-readers-with-color-blindness/ for guidance on presenting data in a more accessible way. | As requested, we have reviewed all our figures and updated the color schemes to be accessible to readers with color blindness. All red/green combinations have been replaced with compliant alternatives. |
| Shadings or symbols in graphs must be defined in some fashion. We prefer that you use a key within the image; do not include colored symbols in the legend/caption. | We have reviewed our graphs and have revised them to meet the specified requirements. All shadings and symbols are now defined by a key integrated within the figure image itself, and we have removed any colored symbols from the figure captions. |
| Figure legends/captions should ideally not exceed 350 words. Please shorten by removing detailed methodological information and/or interpretation, or, if appropriate, consider splitting the affected figures in two. | We have reviewed and edited all legends to ensure they are under the 350-word guideline. This was primarily achieved by removing detailed methodological information as you suggested, while taking care to preserve all essential information necessary to interpret the figures. We confirm their core meaning remains unchanged. |
| Any abbreviations, symbols or colours present in your figures must be defined in the associated legends. | We have checked our figure legends and can confirm that all abbreviations, symbols, and colours used in the figures are defined as requested. |
|  |  |
| **Data and Code** |  |
| Our guidance: | Your response: |
| Nature journals strongly support public availability of data and code. Please deposit the data and code used in your paper into a public data repository, or alternatively, present the data as Supplementary Information. If data can only be shared on request, please explain why in your Data Availability Statement, and also in the correspondence with your editor.   Please note that for some data types, deposition in a public repository is mandatory. Any restrictions on sharing of these data types must be clearly indicated in the statement and discussed with the editor. More information on our data deposition policies and available repositories can be found here: | Thank you for the instructions regarding data and code availability. In full compliance with your policy, we have made all data and code publicly available. The Source Data file contains the data used to generate the main and supplementary figures. In addition, any additional information required to reanalyze the study, including the original high-resolution immunofluorescence images, has been deposited in a public repository (GitHub, archived with Zenodo) and assigned a permanent DOI. The simulation code has likewise been deposited in a separate repository with its own permanent DOI. The Data and Code availability statements in the manuscript now provide all the necessary links and identifiers for access. |
| <https://www.nature.com/nature-research/editorial-policies/reporting-standards#availability-of-data> |  |
| All published manuscripts reporting original research in Nature Portfolio journals must include a data availability statement, within the Methods and under the heading 'Data Availability'.     The data availability statement must make the conditions of access to the “minimum dataset” that are necessary to interpret, verify and extend the research in the article, transparent to readers. We ask that you don’t use phrases like ‘available on reasonable request’ but instead specify any restrictions to accessing your data as described below.    This minimum dataset may be provided through deposition in public community/discipline-specific repositories, custom proprietary repositories or general repositories like Figshare, Zenodo and Dryad. Providing large datasets in supplementary information is strongly discouraged and the preferred approach is to make data available in repositories. Please see https://www.springernature.com/gp/authors/research-data-policy/recommended-repositories for a list of recommended repositories.    If DOIs are provided, we also strongly encourage including these in the Reference list (authors, title, publisher (repository name), identifier, year).    The Data Availability Statement should also reference any source data published alongside the paper.    For clinical datasets or third party data, please ensure that the Data Availability statement adheres to our policy (https://www.nature.com/nature-research/editorial-policies/reporting-standards#availability-of-data)    If data are unavailable, please indicate the exact reasons why data cannot be made available in a suitable public repository or upon request, including any conditions related to ethical approval, consent from study subjects, commercial or legal restrictions, etc.    For data that are available under restricted access, the Data Availability statement must specify  - the reasons for access restrictions  - what the restrictions are   - how one can get access to the data  - who to contact to request access  - any restrictions on who the data can be made available to or for which purpose  - the expected timeframe for response to access requests  - for how long the data will be available once access has been granted. | We have provided a comprehensive 'Data Availability' statement in the Methods section that adheres to all your requirements. In line with your policy, we have deposited all data and code in public repositories with permanent DOIs, which are cited in the reference list. The statement also references the Source Data file and clarifies that all data are publicly available without restriction, ensuring full transparency. |
| Please use the following template to provide all the information stated above:  The XX data generated in this study have been deposited in the YY database under accession code ZZ [add hyperlink here]. The XX data are available under restricted access for {insert reason}, access can be obtained by {explain how}. The raw XX data are protected and are not available due to data privacy laws. The processed XX data are available at YY. The XX data generated in this study are provided in the Supplementary Information/Source Data file. The XX data used in this study are available in the YY database under accession code ZZ [Add hyperlink here]. | As per your instruction, we have updated our Data Availability statement to follow the template you provided. The revised statement now uses the appropriate sentences from your template to describe the public availability of our data in the specified repository and the Source Data file. |
| Please be sure to include the final version of your reporting summary in your submission as a supplementary information file. The reporting summary will be published alongside the paper. Please note that this form is a dynamic 'smart pdf' and must therefore be downloaded and completed in Adobe Reader, instead of opening it in a web browser | We have completed and revised the Reporting Summary, and have included the final version in our submission as a supplementary information file as requested. |
| We notice that you have deposited your code in a Github repository, which we fully support. We strongly encourage you in addition to make your code citable by obtaining a DOI for the Github repository in order to provide a permanent reference to the version of the code used in this study and improve reproducibility. This can be done by linking the repository to Zenodo, following the instructions here: https://guides.github.com/activities/citable-code/ Please cite the Github repository in your manuscript text or Code Availability statement and in your reference list: authors, title (this paper), repository name, DOI identifier, year. Alternatively, you can deposit the code in Gigantum or Code Ocean for the same purpose. | To make our code citable, we have followed your guidance by linking our GitHub repository to Zenodo to generate a permanent DOI. The 'Code Availability' statement and the main reference list have both been updated to include the full, formal citation for the code, including the DOI, to ensure long-term reproducibility. |
|  |  |
| **Methods** |  |
| Our Guidance | Your response |
| The Methods must include a “Statistics & Reproducibility” section with general information on study design, how the statistical analyses of the data were conducted and general information on the reproducibility of experiments. Please include statements on how sample sizes were chosen, on whether any data were excluded (including why), whether randomization and blinding was used. If statements are negative please include the following statements: “No statistical method was used to predetermine sample size. “No data were excluded from the analyses”; "The experiments were not randomized"; "The Investigators were not blinded to allocation during experiments and outcome assessment”. | We have now added a "Statistics & Reproducibility" section to the Methods. This section provides specific information on our experimental design, sample size determination, data exclusion, replication, randomization, and blinding, as per your guidelines.  Revisions: No statistical method was used to predetermine sample size. No data were excluded from the analyses. Sample sizes were determined based on the variation observed in pilot experiments to ensure that the magnitude and consistency of measurable differences between groups were reliable. All statistical analyses were conducted using Origin (v2025b). Two-tailed unpaired Student's t-tests were used for comparisons between two groups. In this work, *** represents p < 0.01, ** represents p < 0.05, * represents p < 0.1, n.s. represents p > 0.1. All graphs and data are representative of more than three independent experiments. Values are presented as mean values +/- standard deviation (s.d.). The experiments were randomized; all samples were randomly allocated to experimental groups. The investigators were blinded to group allocation during experiments and outcome assessment, including data collection and analysis. |
| Sufficient details of the experiments must be provided in the Methods section such that they could be reproduced without reference to published papers. Use of the term "as described previously" is not encouraged. | We have re-examined our Methods section and confirm that it contains sufficient detail for all experiments to be reproduced. For the ‘Rheometry analysis’ and ‘Measurement of cell actin fibers alignment’ sections, while we cite previous work, the full experimental protocols for replication are already provided within our text. The citations are intended for readers interested in the theoretical background of the techniques, not for procedural instructions. The manuscript therefore already meets this requirement. |
| Centrifugation speeds must be reported in x g. | As requested, we have updated the manuscript to report all centrifugation speeds in g. The values formerly in rpm have been converted and corrected. |
| A full Methods section, divided into subsections and subheadings, must be provided in the main manuscript. There is no word limit to this section. | As requested, we have updated our manuscript to include a full Methods section within the main text, which has been organized into subsections with corresponding subheadings. |
|  |  |
| **References** |  |
| Our Guidance | Your response |
| Supplementary References should appear at the end of the Supplementary Information file, and must be self-contained and numbered from 1. References mentioned in both the main text and the Supplementary Information should be part of both reference lists so that the Supplementary Information does not refer to the reference list in the main paper and vice versa. | We have reviewed our files and can confirm that the Supplementary Information contains its own self-contained reference list at the end, numbered from 1. We have also ensured that the reference lists in the main manuscript and the Supplementary Information are independent of each other, with any overlapping references included in both lists as required. |
|  |  |
| **End matter** |  |
| Our guidance: | Your response: |
| Please confirm that all relevant funding awarded to each author is described in the Acknowledgements section. List each grant number, followed by the initials of the author who received it. Make sure author initials are unambiguous by spelling out last names if necessary. | We have carefully reviewed and revised the Acknowledgements section to ensure it fully complies with your policy. It now includes all relevant grant numbers, each followed by the unambiguous initials of the author who received the funding. |
| Please supply an "Author Contributions" section after the "Acknowledgements" section that refers to all authors. For more information on the Author Contributions statement, please refer to our authorship policy(https://www.nature.com/nature-research/editorial-policies/authorship), and to the following Nature Editorial: https://www.nature.com/articles/4581078a. | We have added an "Author Contributions" section to our manuscript, placed after the Acknowledgements section as requested. The statement describes the contributions of all co-authors. |
| Please ensure the Author Contributions section mentions each author’s initials at least once with their contributions to the work. Authors with the same initials must be differentiated in the statement. Blanket statements such as “All authors performed experiments” do not replace the need to list each author’s initials at least once. | We confirm that the "Author Contributions" section in our manuscript has been written to meet these standards, with specific contributions listed for each author by their initials as required. |
| Nature Portfolio defines Competing Interest (CI) as financial and non-financial interests (including but not limited to funding, employment, stocks, shares, patents, personal or professional relationships with individuals or institutions, and unpaid membership advocacy) that could be perceived to directly undermine the objectivity, integrity, and value of a publication, or could be seen as having an influence on the judgments and actions of authors with regard to objective data presentation, analysis, and interpretation.  Please thoroughly review our policy on Competing Interests and include a detailed statement both in your final manuscript file and in our manuscript tracking system. Please ensure the statements are identical in both. Be specific about how each point stated relates to the research and list applicable author initials, and/or patent numbers.  If there are no competing interests, a negative statement must be included: “The authors declare no competing interests.” | We confirm that there are no competing interests to declare. The required statement, "The authors declare no competing interests.," has been included in both the manuscript and the submission system as requested. |
| <https://www.nature.com/nature-research/editorial-policies/competing-interests> |  |
| If only some of your authors declare competing interests, then please list them and end the statement with the words “The remaining authors declare no competing interests.” | We can confirm that this scenario does not apply to our manuscript, as no authors have competing interests to declare. |
| Competing interests are not only financial. Please do not mention the word “financial” in your Competing Interests statement | Our statement reads, "The authors declare no competing interests," and therefore already complies with this instruction. |
|  |  |
| **Additional Revisions** |  |
| Our Guidance: | Your Response: |
| For any Supplementary Figures, please check and confirm that: * If data is presented as bar charts, individual data points are shown using overlaid dot plots. * The n number (i.e. the sample size used to derive statistics) is provided and defined as a precise value (not a range), using the wording “n=X samples/cells/independent experiments” etc. where applicable. * Any chart axis, error bars, scale bars, molecular weight markers, symbols and colour scales are defined. * Any statistical tests used for data analysis are specified and exact p-values are provided either on the figures themselves, in the legend or in the Source Data file. * Wherever representative data such as blots or micrographs are shown, the legend indicates how many times the experiment was repeated with similar results. * Full uncropped scans of any cropped gel/blot images are provided as an additional Supplementary Figure or in the Source Data file. | Thank you for the detailed instructions. We have thoroughly revised our Supplementary Figures and their legends to ensure they meet all the requirements you outlined. We have updated our data presentation to clearly show data distribution by overlaying data points on bar charts for small n values (n ≤ 10) and using scatter plots for larger datasets. We have also specified precise n numbers, defined all figure elements like error bars and scale bars, included the specific statistical tests with exact p-values, stated the number of experimental replications for representative images, and provided full uncropped scans for all gels and blots. We are confident that our supplementary materials are now fully compliant. |
|  |  |
| **Preparing your manuscript files** |  |
| Our guidance: | Your response: |
| Unless otherwise stated please limit individual file sizes to approximately 30MB. We strongly encourage the use of repositories for large datasets or source data due to size considerations. | We have checked and can confirm that all individual files are below the 30MB size limit. |
| Please supply in your response box here a brief two-sentence summary (maximum 250 characters, including spaces) of the main finding of the paper to be used on our website and in our e-alerts. The summary should be written in the third person, in language suitable for a broad audience. It should follow the structure: "[Brief background first sentence]. Here, authors [brief description of accomplishment]." | Cells struggle to migrate on soft substrates, which don't provide enough traction. Here, authors show that rapid, cyclic changes in substrate rigidity allow cells to overcome this limitation and move quickly. |
| Please supply the main manuscript file in Microsoft Word format | The main manuscript has been supplied in Microsoft Word format as requested. |
| Please confirm that all figures and tables that are presented in the main manuscript and supplementary information files can be reproduced with the data and code that has been deposited and shared. If not, please provide a Source Data file. To learn more about our motivation behind this policy, please see https://www.nature.com/articles/s41467-018-06012-8.   The Source Data file should, as a minimum, contain the data underlying the following types of display items in the main manuscript and the supplementary information file:  - Any reported means/averages in box plots, bar charts, and tables  - Dot plots/scatter plots, especially when there are overlapping points  - Line graphs  - Uncropped and unprocessed scans of all blots and gels. The edge of membranes and molecular weight ladders should be visible on all blots. Where membranes have been cut, please ensure that at least one marker above and below the bands of interest is present.   For an example of presentation of Source Data, including graphs, plots and full scan blots, see the Source Data file of https://www.nature.com/articles/s41467-020-16984-1#Sec35 and for more information, please refer to https://www.nature.com/nature-research/editorial-policies/image-integrity.  The Source Data should be provided in a single Excel file with data for each figure/table in a separate sheet, or in multiple labelled files within a zipped folder.   You can see full instructions at https://www.nature.com/ncomms/submit/how-to-submit but we would recommend checking one of our recently published papers to see the correct format (e.g. https://www.nature.com/articles/s41467-019-09715-8#Sec29). Please include data in the rawest form possible. For example, for qPCR please include Ct values for test and reference genes rather than normalized expression values.   Please label the file as ‘Source Data’ and upload using the option Supplementary Dataset on our submission system. Please include a reference to your Source Data file in the Data Availability statement using the phrase “Source Data are provided with this paper”.  A Source Data file is not necessary for raw data and code that has already been shared in a public repository and all display items that are presented in the main manuscript and supplementary information files can be reproduced. | Thank you for the detailed instructions regarding data reproducibility and the Source Data file.  To ensure that all display items can be fully reproduced, we have prepared and submitted a "Source Data" file as requested. This file contains the underlying data for the figures and tables presented in our manuscript and supplementary information, following the format guidelines.  We have uploaded this file using the "Supplementary Dataset" option in the submission system. Additionally, we have updated our Data Availability statement to include the phrase: "Source Data are provided with this paper."  We can now confirm that with the data and code already deposited, in combination with this newly provided Source Data file, all figures and tables in the main manuscript and supplementary information files are fully reproducible. |
| Please supply legends for each of your 21 Supplementary Movie files in your response box, right here (not in the Supplementary Information file and not in the Main Text). Please label each file as Supplementary Movie 1, etc. | Supplementary Movie 1. HMSCs on soft substrates with a Young’s modulus of approximately 1.6 kPa. hMSCs exhibit minimal migration on soft substrates with a Young’s modulus of ~1.6 kPa.  Supplementary Movie 2. HMSCs on rigid substrates with a Young’s modulus of approximately 13.0 kPa. hMSCs migrate efficiently on rigid substrates with a Young’s modulus of ~13.0 kPa.  Supplementary Movie 3. HMSCs on PYP hydrogels with fast cyclic rigidity changes (1 min on/off). hMSCs exhibit rapid migration under cyclic rigidity changes with 1-min cycles.  Supplementary Movie 4. HMSCs on PYP hydrogels with cyclic rigidity changes (5 min on/off). hMSCs migrate rapidly under cyclic rigidity changes with 5-min cycles.  Supplementary Movie 5. HMSCs on PYP hydrogels with slow cyclic rigidity changes (10-min on/off). No significant changes in migration are observed under cyclic rigidity changes with 10-min cycles.  Supplementary Movie 6. HMSCs on soft substrates with a Young’s modulus of approximately 2.2 kPa. hMSCs exhibit minimal migration on soft substrates with a Young’s modulus of ~2.2 kPa.  Supplementary Movie 7. HMSCs on polyacrylamide hydrogels (PA gels, Young's modulus ~2.2 kPa). Cyclic illumination has no impact on cell migration on photo-insensitive PA gels.  Supplementary Movie 8. HMSCs on PYP hydrogels with fast cyclic rigidity changes for the first 6 hours, followed by static rigidity in the final 6 hours. Cell migration slows down after the cessation of fast cyclic rigidity changes.  Supplementary Movie 9. HMSCs on PYP hydrogels with fast cyclic rigidity changes, supplemented with a Rac1 inhibitor. The inhibition of Rac1 results in a significant reduction in cell migration on dynamically changing substrates.  Supplementary Movie 10. HMSCs on PYP hydrogels with fast cyclic rigidity changes, supplemented with latrunculin A. The inhibition of actin polymerization by latrunculin A leads to a marked reduction in cell migration on dynamic substrates.  Supplementary Movie 11. HMSCs on PYP hydrogels with fast cyclic rigidity changes, supplemented with β1-integrin blocking. The blockade of β1-integrin results in a significant reduction in cell migration on dynamic substrates.  Supplementary Movie 12. Actin retrograde flow dynamics of hMSCs on PYP hydrogels with fast cyclic rigidity changes (1 min on/off).  Supplementary Movie 13. Actin retrograde flow dynamics of hMSCs on rigid substrates with a Young’s modulus of approximately 13.0 kPa.  Supplementary Movie 14. Actin retrograde flow dynamics of hMSCs on soft substrates with a Young’s modulus of approximately 2.2 kPa and 1.6 kPa.  Supplementary Movie 15. Focal adhesion dynamics of hMSCs on PYP hydrogels with fast cyclic rigidity changes (1 min on/off).  Supplementary Movie 16. Focal adhesion dynamics of hMSCs on rigid substrates with a Young’s modulus of approximately 13.0 kPa.  Supplementary Movie 17. Focal adhesion dynamics of hMSCs on rigid substrates with a Young’s modulus of approximately 2.2 kPa.  Supplementary Movie 18. Focal adhesion dynamics of hMSCs on rigid substrates with a Young’s modulus of approximately 1.6 kPa.  Supplementary Movie 19. HMSCs overexpressing Talin on PYP hydrogels with fast cyclic rigidity changes. hMSCs overexpressing Talin shift to a mesenchymal migration mode on dynamic soft substrates.  Supplementary Movie 20. HMSCs on PYP hydrogels with fast cyclic rigidity changes, supplemented with non-phototoxic Blebbistatin inhibitors. Inhibition of myosin II activity with Blebbistatin significantly reduces cell migration on dynamic substrates.  Supplementary Movie 21. HMSCs on PYP hydrogels with fast cyclic rigidity changes, with a larger softening amplitude from the rigid state. Cells exhibit faster migration speed, shorter elongation duration, and higher snap-back frequency during migration. |
| Please remember to make at least one reference to each of these Supplementary Movies in the Main Text. | We have verified that all Supplementary Movies are referenced accordingly in the main text. |
| The use or adaptation of previously published images is strongly discouraged. If this is unavoidable, please request the necessary rights documentation to re-use such material from the relevant copyright holders and return this to us when you submit your revised manuscript. Please check whether your manuscript or Supplementary Information contain third-party images, such as figures from the literature, stock photos, clip art or commercial satellite and map data.  If any elements of your submitted work have been created with BioRender you will need to ensure you have obtained a publication license from BioRender, adhering to the user requirements as outlined within the license. The reference for BioRender created graphics should be present in the accompanying legend of the display material it is present in.  A copy of the publication license should be uploaded to our system as a related manuscript file upon resubmission.  For more information please see the BioRender knowledge article here: https://help.biorender.com/hc/en-gb/articles/21283116932765-CC-BY-publishing-and-reader-permissions  For more information on what constitutes ownership by a third party, please contact our Editorial Assistant at naturecommunications@nature.com | Thank you for the note regarding third-party content. We confirm that our manuscript does not contain any third-party images, except for elements in Figure 1(a) which were created with BioRender. We have properly cited BioRender in the legend and uploaded the publication license with this revision. The schematics in Figures 5(a) and 5(h) are our original creations, drawn using Adobe Illustrator, and we have included the source vector files in our resubmission to confirm their originality. |
| Please check in particular: |  |
| **Please note that suspected third party content is present in figures 1 (a), 5 (a, h).** |  |
| **Please provide us with detailed information on the creation of each of the figure panels cited above. Please be as specific as possible and give an answer for each panel, otherwise further details will be asked and this will cause delays. >Were these images and every element of these images created by you and/or your co-Authors? >Which software was used? >Were they created using any previously-created elements? If the images are from a database, please supply proof of permission for their use (receipt, express permission from creator, confirmation of compatible Open Access license or Public Domain). If any images are from BioRender or similar, please follow instructions above.** | **Thank you for the opportunity to provide detailed information on the creation of our figure panels. Below is a breakdown for each panel you cited, answering the specific questions raised.  Figure 1(a)**  **Were these images and every element of these images created by you and/or your co-Authors?**  **The overall composition and design of this panel were created by us. However, the specific graphical icons within the panel were generated using elements from the BioRender.com licensed library.**  **Which software was used?**  **BioRender.com.**  **Were they created using any previously-created elements?**  **Yes. As stated above, licensed elements from the BioRender library were used. We have followed the journal's instructions by including a citation in the figure legend and have uploaded our publication license from BioRender as a related manuscript file with this resubmission.**  **Figure 5(a, h)**  **Were these images and every element of these images created by you and/or your co-Authors?**  **Yes, this schematic and every element within it were created entirely by us, the authors.**  **Which software was used?**  **Adobe Illustrator.**  **Were they created using any previously-created elements?**  **No. This image is an original work drawn from scratch. It was not created using any previously-created elements, templates, or assets from any database. To verify its originality, we have uploaded the native Adobe Illustrator source file (.ai) with our resubmission.** |
|  |  |
| **Forms to complete** |  |
| Our guidance: | Your response: |
| **Editorial Policy Checklist** |  |
| Please update and upload a final version of the Editorial Policy Checklist with your revised manuscript files. A blank Editorial Policy Checklist can be found via the link below. Note that this form is a dynamic ‘smart pdf’ and must be downloaded and completed in Adobe Reader. | We have completed the updated Editorial Policy Checklist and have uploaded the final version with our revised manuscript files as requested. |
| Please update your current checklist or download from: |  |
| <https://www.nature.com/documents/nr-editorial-policy-checklist.pdf> |  |
| **Reporting Summary** |  |
| Please revise the Reporting Summary according to the requests below. After making the requested changes, please be sure to include the final version of your Reporting Summary in your submission as a supplementary information file. Please note that this form is a dynamic 'smart pdf' and must therefore be downloaded and completed in Adobe Reader, instead of opening it in a web browser. | We have revised the Reporting Summary according to your requests and have uploaded the final version as a supplementary information file with our submission. |
| Please update your current checklist or download from: |  |
| https://www.nature.com/documents/nr-reporting-summary.pdf |  |
|  |  |
| **Reporting Summary** |  |
| Our Guidance | Your response |
| **Statistics** |  |
| Checkbox 10: Please mark this field as "confirmed", as estimates of effect sizes (Pearson's r, Cohens d) have been referenced in the manuscript. | Thank you for pointing out this oversight and for the clear instruction. We appreciate you catching that. We have now marked Checkbox 10 as 'confirmed' in the Reporting Summary as requested. |
| **Software** |  |
| Please ensure all the data collection/data analysis software/tools/algorithms/packages used in the study are clearly mentioned in the manuscript and are also listed in the reporting summary (with version numbers). | As requested, we have updated our manuscript and reporting summary to clearly list all software and tools used in our study. We have ensured that version numbers are included for each item. |
| **Data Availability** |  |
| Please provide a complete data availability statement in the manuscript and in the reporting summary. | We have updated the Data Availability Statement in the manuscript and the reporting summary as required. |
| Please consider making "Any additional information required to reanalyze the data" available in a publicly accessible repository, or explain to the editor and in the Data Availability statement why the data can only be made available from the authors on request. . | As per your suggestion, we have ensured that any additional information required to reanalyze the data from our study is available in our publicly accessible repository. The repository now contains all necessary files to allow for independent replication of our findings. |
| **Field Specific Reporting** |  |
| **Antibodies** |  |
| Please specify the source and amount/dilution of all antibodies used. For commercially sourced antibodies please state the supplier name, catalog number, clone name, lot number as applicable in both the manuscript and relevant section of the Reporting Summary. | We have revised the manuscript and Reporting Summary to provide complete details for all antibodies used. This now includes their source, dilution, and all relevant supplier information, such as catalog and lot numbers. |
| Please provide information on antibody validation in the reporting summary for all the primary antibodies. Please refer to the specific section of the manuscript, previous literature or manufacturer websites as applicable. | we have provided information on antibody validation in the reporting summary. The summary now includes validation details for all primary antibodies used in our study. |
| **Eukaryotic cell lines** |  |
| Please identify in the Methods section and in the reporting summary the name and source of all cell lines used, (with catalog number if obtained from vendor or cell bank). If any cell line(s) are established from primary cells of humans or vertebrate models, then please ensure the sex is specified in this field of the reporting summary. | As per your request, we have updated our manuscript and reporting summary to provide complete details for all cell lines used. This includes their source and catalog numbers, as well as specifying the sex for relevant lines. |
| Please describe the authentication procedures for each cell line used in the reporting summary and manuscript. Please specify the techniques used (STR profiling, Karyotyping, DNA barcoding, PCR assays with species-specific primers, etc). Alternatively, declare which of the cell lines used were not authenticated. | We have investigated the cell line authentication and apologize for our previous incorrect description. The human adipose-derived mesenchymal stem cells (MSCs) used in this study, provided by Hunan Maybio Bio-Pharmaceutical Co., Ltd., were not formally authenticated but were confirmed for tri-lineage differentiation potential, mycoplasma-free, sterile, and endotoxin-compliant. We have now updated the manuscript and reporting summary to state this clearly. |
|  |  |
|  |  |
|  |  |
|  |  |
| **You will need to upload:** |  |
| A completed copy of this checklist |  |
| The main manuscript file in Microsoft Word format |  |
| Separate Main Figure files |  |
| A single Supplementary Information PDF file |  |
| Supplementary Movie files |  |
| A single Source Data Excel file |  |
| An inventory of Supporting Information (a simple document listing figs, sup figs, tables, movies, etc.) |  |
| Reporting Summary |  |
| Completed Third Party Rights Table or BioRender license (if relevant) |  |
|  |  |
|  |  |
|  |  |
|  |  |
|  |  |
|  |  |
|  |  |
|  |  |
|  |  |
|  |  |
|  |  |
|  |  |
|  |  |
