# Supplementary material for: Dynamic Rigidity Changes Enable Rapid Cell Migration on Soft Substrates
Source: Research Square preprint supplement (doi:10.21203/rs.3.rs-5225113/v1), 2025-08-19
Supplement: Supplementary file 3 [file 72981ca8b0fc4ad21ed09699.xlsx]

## Sheet: Fig 1f
T (min)	1min		5min		10min		2.2kPa		1.6kPa		13.0kPa
10	5.95002	0.69606	3.0209	0.50296	0.24067	0.03047	0.16857	0.02649	0.16857	0.02943	2.15733	0.33668
20	11.9551	2.21732	5.86514	0.75094	0.26023	0.04371	0.37184	0.04942	0.37184	0.06264	4.3564	0.52917
30	17.8287	2.27677	8.98729	1.19774	0.59929	0.09173	0.48999	0.08014	0.48999	0.09033	6.53072	1.156
40	23.6247	3.20048	11.8975	2.16329	0.71112	0.10276	0.73526	0.11648	0.73526	0.1294	8.70866	1.4531
50	29.4241	5.37388	14.9152	1.70912	0.9808	0.11776	0.93059	0.15975	0.93059	0.14445	10.8721	1.28332
60	35.7886	4.39089	17.8641	2.03299	1.20213	0.15683	1.14671	0.18366	1.14671	0.20023	13.0613	1.53517
70	41.4499	6.2396	20.7763	2.75954	1.26561	0.14327	1.27355	0.22001	1.27355	0.22762	15.263	1.83815
80	47.1107	8.71973	23.7742	3.7524	1.4866	0.23926	1.53575	0.21038	1.53575	0.27171	17.3663	3.02377
90	53.0675	8.63755	26.5637	3.43967	1.86222	0.34555	1.77586	0.30447	1.77586	0.29706	19.5778	2.97068
100	58.8099	7.90052	29.634	5.32524	1.99682	0.32742	1.87475	0.31573	1.87475	0.28463	21.7214	3.54636
110	65.0631	10.5836	32.5333	5.94587	2.10209	0.33858	2.11637	0.28594	2.11637	0.24666	23.9427	4.46851
120	71.6984	9.92629	35.5271	4.12327	2.3559	0.34108	2.28235	0.3381	2.28235	0.26101	26.0897	4.71334
130	76.719	9.3061	38.4815	4.48889	2.51026	0.34214	2.48212	0.32797	2.48212	0.44705	28.2023	4.56485
140	83.3359	12.6068	41.7233	5.66808	2.62107	0.47222	2.65436	0.34744	2.65436	0.44131	30.5027	3.74298
150	88.7806	12.8227	44.5205	5.16049	2.90641	0.42727	2.78657	0.32542	2.78657	0.40443	32.672	6.00404
160	94.9099	15.7474	47.3051	7.3215	3.23757	0.5175	2.85412	0.49903	2.85412	0.49285	34.6631	6.20087
170	100.699	18.8145	50.7213	7.34799	3.33716	0.41935	3.03143	0.4849	3.03143	0.39557	37.0002	6.77782
180	106.82	16.6253	53.5434	7.46488	3.45311	0.60107	3.38254	0.48449	3.38254	0.40491	39.1493	4.60676
190	113.049	17.1531	56.0335	8.1354	3.76061	0.54177	3.54528	0.59161	3.54528	0.49315	41.2083	5.31009
200	118.643	19.4765	59.3426	9.3158	3.88582	0.49946	3.70925	0.47427	3.70925	0.65863	43.5106	6.10572
210	124.735	17.6708	61.8537	7.14019	4.21794	0.69713	3.91905	0.6029	3.91905	0.44438	45.6667	7.2009
220	130.103	16.2548	65.3485	7.94044	4.30325	0.50368	4.09226	0.69547	4.09226	0.51276	47.8799	7.80362
230	136.313	22.0691	68.1467	10.5203	4.52981	0.52226	4.38641	0.66212	4.38641	0.68843	49.8356	5.89125
240	141.739	16.7978	70.854	8.60568	4.70686	0.74562	4.55133	0.78158	4.55133	0.61019	52.2244	8.37198
250	149.022	21.5443	74.2534	13.1052	5.02218	0.92716	4.6572	0.75213	4.6572	0.69214	54.3435	9.30335
260	152.452	18.5187	77.3434	12.3583	5.12666	0.74283	4.79535	0.88406	4.79535	0.68394	56.4875	8.12872
270	159.198	28.0534	80.2528	13.0821	5.32631	0.84122	5.09421	0.73666	5.09421	0.94226	58.6295	10.9413
280	165.532	27.0869	83.4302	12.3657	5.53592	0.95545	5.22765	0.80998	5.22765	0.80884	60.8961	7.25841
290	172.134	25.5244	86.2879	11.7881	5.79474	0.93028	5.38619	0.66001	5.38619	0.86016	62.9176	7.25367
300	178.921	24.1493	89.7244	15.3254	6.03664	0.87392	5.6409	0.86847	5.6409	0.70717	65.1359	10.3546
310	183.72	22.5331	91.7232	12.1969	6.17754	0.82955	5.88407	0.829	5.88407	1.03627	67.3196	7.8673
320	187.743	28.2363	95.0043	15.4971	6.22752	1.12311	5.8972	0.73866	5.8972	1.01074	69.5252	9.02149
330	195.555	23.0882	98.2279	17.0527	6.59327	0.93178	6.03806	1.02758	6.03806	0.97195	71.7841	8.29427
340	201.113	33.8503	101.15	11.6879	6.65782	0.93436	6.32238	0.87471	6.32238	1.0615	73.9224	12.6324
350	207.539	34.7709	103.99	18.7465	6.89401	1.17569	6.54649	0.77453	6.54649	0.74174	76.1185	13.0451
360	213.107	24.0047	106.829	13.0186	7.13346	1.01376	6.68789	1.11484	6.68789	1.10166	78.3015	13.6458
370	218.921	26.4618	110.39	19.6699	7.3851	1.24068	6.7132	0.86705	6.7132	1.10363	80.5228	13.0551
380	224.937	29.7072	112.979	13.9687	7.46641	1.26164	6.91186	0.80337	6.91186	1.02869	82.4493	15.4336
390	231.12	42.7034	116.155	14.5058	7.72283	1.31178	7.30565	0.82947	7.30565	0.94726	84.7819	13.7008
400	235.712	32.4553	119.689	22.2376	7.87207	1.44032	7.3868	1.10315	7.3868	0.90683	87.0275	12.7452
410	242.123	42.1068	121.172	15.1768	8.09362	0.92889	7.5868	1.12882	7.5868	1.01938	88.9149	11.4509
420	247.889	41.6012	124.885	17.5866	8.14821	1.49894	7.86087	1.24955	7.86087	1.00343	91.3157	14.3818
430	254.34	44.9591	127.481	21.4359	8.32022	0.93795	8.03271	0.96421	8.03271	1.35167	93.5601	12.1921
440	260.751	46.0859	131.05	15.7662	8.82874	0.99503	8.1051	1.20419	8.1051	0.98961	95.7334	13.3861
450	265.755	48.3738	133.102	21.1094	8.91161	1.5412	8.29861	1.31722	8.29861	1.37424	97.734	11.672
460	272.448	51.019	135.884	15.8319	9.01865	1.36367	8.51859	0.98871	8.51859	1.18767	100.066	14.4749
470	278.782	36.0914	139.325	22.5389	9.36425	1.27991	8.84406	1.55029	8.84406	1.53637	102.344	11.5787
480	285.236	39.2089	141.979	20.5708	9.43949	1.75429	8.96923	1.31996	8.96923	1.17681	104.338	12.3526
490	288.535	50.7818	145.911	18.2543	9.67115	1.69818	9.29973	1.12178	9.29973	1.24875	106.499	15.458
500	294.611	47.0418	148.135	26.4112	10.0309	1.4964	9.32194	1.37865	9.32194	1.49598	108.859	17.221
510	301.575	51.8558	151.381	27.788	10.1132	1.88557	9.47623	1.4619	9.47623	1.50225	110.929	14.617
520	308.817	39.1544	154.278	17.6675	10.1968	1.15842	9.72795	1.17656	9.72795	1.69902	113.152	13.0086
530	314.224	44.5809	156.442	21.2372	10.5727	1.34655	9.88941	1.47141	9.88941	1.33813	115.183	18.6613
540	318.231	56.5118	159.712	21.262	10.6814	1.56218	10.0718	1.44757	10.0718	1.80695	117.326	16.1084
550	324.419	45.7488	163.08	18.5214	10.8627	1.89084	10.3552	1.2898	10.3552	1.80578	119.656	20.8463
560	330.797	53.3942	165.851	18.9137	11.0789	1.4478	10.3114	1.81485	10.3114	1.55012	121.437	19.9654
570	336.253	43.9675	169.113	19.9533	11.2254	1.84264	10.5771	1.64009	10.5771	1.75972	123.922	19.067
580	343.763	52.3696	171.486	26.4912	11.5237	1.45508	10.8469	1.55289	10.8469	1.43692	126.193	20.0783
590	347.491	50.9645	174.876	21.7062	11.7242	1.51685	10.9474	1.78222	10.9474	1.80679	128.021	23.3273
600	356.654	40.7605	178.505	20.8071	11.9762	2.13858	11.1853	1.47074	11.1853	1.90153	130.421	23.2065
610	360.391	62.0729	181.038	26.5194	12.0772	1.98935	11.3366	1.61141	11.3366	1.99033	132.478	19.2258
620	368.915	51.8909	183.923	30.7447	12.2424	1.60742	11.5205	1.78357	11.5205	1.90692	134.48	23.6681
630	373.677	65.7785	185.948	23.9717	12.4488	1.59304	11.8203	1.37503	11.8203	2.00443	137.13	24.2852
640	381.265	68.6444	190.001	26.443	12.7135	2.00728	11.897	1.68663	11.897	1.69799	139.202	26.0941
650	386.593	48.8526	193.151	23.6117	12.9286	1.69735	12.0964	2.08428	12.0964	2.02737	141.436	17.8435
660	391.945	55.6587	195.778	23.7567	13.149	2.39295	12.1681	2.06196	12.1681	2.07255	143.185	16.947
670	397.687	50.313	199.061	23.7482	13.0193	2.36199	12.4464	1.72977	12.4464	1.46159	145.929	24.6178
680	402.585	66.4718	201.319	23.8904	13.329	1.51786	12.6786	2.1235	12.6786	1.61552	147.934	27.3182
690	406.126	65.7525	204.064	34.9151	13.6126	2.21471	12.757	1.60809	12.757	2.07833	149.992	17.3337
700	414.698	73.779	207.068	27.1546	13.8712	2.22713	13.0759	2.06035	13.0759	2.29739	152.291	17.2618
710	421.754	49.7421	210.406	24.1408	13.9194	2.09701	13.3423	2.27524	13.3423	2.42321	154	17.9813
720	424.572	69.8031	214.16	31.5567	14.3164	2.61245	13.4476	1.77463	13.4476	1.70396	156.517	28.589

## Sheet: Fig1g+Fig3f+Fig4g+FigS29
1min	5min	10min	2.2kpa	1.6kpa	13.0kpa	Rac	Lat.A	beta1	OE talin	pMyosin	1min-simu	40%-exp	40%-simu
0.64924	0.35846	0.01988	0.01906	0.01845	0.24938	0.04966	0.11001	0.02606	0.14219	0.03121	0.55177	0.83215	1.16843
0.60815	0.29548	0.01987	0.01879	0.01833	0.1725	0.0495	0.11767	0.0259	0.15718	0.03057	0.63144	1.08862	0.97919
0.71995	0.37828	0.01989	0.01847	0.01786	0.26374	0.04931	0.089	0.02276	0.06842	0.02963	0.69491	0.89011	1.25151
0.54586	0.25381	0.01983	0.01906	0.0179	0.17006	0.05047	0.08134	0.02593	0.15439	0.0304	0.60327	1.11742	0.98509
0.64649	0.29523	0.01971	0.019	0.01833	0.24864	0.05096	0.10938	0.02641	0.28993	0.0302	0.54311	1.0204	0.67216
0.64529	0.32845	0.01964	0.01901	0.01825	0.14425	0.04956	0.1204	0.02459	0.1024	0.03034	0.64652	0.96063	1.12717
0.57914	0.32184	0.01945	0.01851	0.01838	0.167	0.05144	0.10213	0.02303	0.02672	0.0305	0.72831	1.02088	1.13921
0.60797	0.31946	0.0195	0.01891	0.01815	0.23154	0.0487	0.09927	0.02135	0.3729	0.02962	0.48451	1.17651	1.17566
0.52881	0.26976	0.01971	0.01861	0.01788	0.15086	0.04945	0.09649	0.02473	0.07842	0.03129	0.61992	1.13116	0.97127
0.56254	0.27846	0.01993	0.01919	0.01833	0.27697	0.05102	0.09637	0.02511	0.28435	0.03076	0.59016	0.9598	0.86777
0.52045	0.2268	0.0203	0.01889	0.01822	0.23739	0.05003	0.09188	0.02414	0.1164	0.03078	0.61165	1.17002	1.15787
0.66519	0.30831	0.01978	0.01918	0.01831	0.15539	0.05107	0.08804	0.02639	0.16055	0.02977	0.52287	0.99107	1.30352
0.59573	0.20024	0.0194	0.01933	0.01828	0.23101	0.04829	0.08077	0.02542	0.08455	0.03026	0.50427	1.12421	1.07797
0.57374	0.33106	0.0197	0.01852	0.01828	0.35526	0.05015	0.10982	0.02675	0.31839	0.02925	0.60283	1.23177	1.07845
0.5927	0.3084	0.02013	0.0189	0.01816	0.28555	0.04843	0.0863	0.02446	0.2396	0.03061	0.50093	0.99308	0.92376
0.51874	0.36306	0.01936	0.01894	0.01814	0.20203	0.04868	0.10973	0.02811	0.26892	0.03042	0.50083	1.11506	0.83331
0.65651	0.31132	0.01889	0.01877	0.01845	0.19249	0.05105	0.08868	0.0244	0.02927	0.02895	0.68159	1.15827	1.04429
0.63612	0.32555	0.0201	0.01894	0.01836	0.29373	0.04621	0.10796	0.02863	0.16743	0.02998	0.60825	1.02701	1.0775
0.52398	0.30328	0.02027	0.01898	0.01807	0.11295	0.04991	0.08599	0.02672	0.17152	0.02906	0.55832	0.98087	1.11156
0.5989	0.33978	0.01944	0.01894	0.01813	0.19129	0.05166	0.11236	0.02999	0.0529	0.02869	0.60217	1.02305	1.14129
0.61531	0.32667	0.01978	0.01922	0.01827	0.33415	0.04798	0.07371	0.02406	0.09122	0.02999	0.59347	1.03636	0.73538
0.45788	0.29984	0.02005	0.01902	0.01826	0.18591	0.05273	0.10363	0.02539	0.10641	0.03063	0.50534	1.25126	0.75521
0.64859	0.35208	0.02011	0.01839	0.01827	0.24402	0.04888	0.11039	0.02706	0.06295	0.02876	0.57091	0.95975	1.14587
0.54817	0.27484	0.0194	0.01883	0.01834	0.23629	0.04977	0.05231	0.02369	0.22053	0.03055	0.45986	0.94653	1.02608
0.69021	0.24913	0.01952	0.01875	0.01775	0.1554	0.0492	0.10664	0.02594	0.03524	0.03075	0.53727	0.9989	0.87793
0.44565	0.37636	0.01977	0.01891	0.01839	0.10399	0.04872	0.10498	0.0251	0.16274	0.02988	0.55832	0.99818	1.12927
0.5207	0.26875	0.02042	0.01883	0.01827	0.2368	0.0505	0.10404	0.02508	0.05254	0.02962	0.66275	0.96174	1.07408
0.65184	0.2977	0.01974	0.01865	0.01832	0.23018	0.0521	0.08903	0.02581	0.13214	0.03033	0.45576	0.94605	1.03055
0.67376	0.30005	0.01992	0.01891	0.01842	0.23779	0.05033	0.08684	0.0163	0.22262	0.02831	0.55874	1.06055	1.09039
0.64613	0.23052	0.0196	0.01874	0.01874	0.10904	0.04871	0.13988	0.03041	0.31999	0.03056	0.61363	1.13776	0.96792
0.67338	0.30869	0.01919	0.01886	0.01846	0.24135	0.0515	0.07084	0.02504	0.25395	0.0296	0.56035	0.99029	0.9458
0.43246	0.24786	0.01936	0.01857	0.01805	0.15734	0.04826	0.10167	0.02843	0.23733	0.02895	0.75317	1.23676	1.19549
0.63074	0.33483	0.0202	0.01874	0.01804	0.22081	0.04867	0.06678	0.02732	0.21453	0.0293	0.58281	1.03762	1.37246
0.48907	0.29506	0.01988	0.0186	0.01827	0.25499	0.05272	0.08476	0.02578	0.15056	0.0311	0.74955	0.93556	1.09333
0.4806	0.29921	0.01978	0.01893	0.01804	0.31018	0.04956	0.09936	0.02744	0.01237	0.02966	0.67338	1.06632	0.9796
0.69132	0.27482	0.01945	0.01867	0.01814	0.2749	0.04973	0.10147	0.02441	0.11745	0.03014	0.66666	1.19189	1.05181
0.61655	0.26684	0.02014	0.01888	0.01826	0.23753	0.0511	0.11546	0.02626	0.23042	0.0297	0.69409	1.04957	1.02852
0.6741	0.37158	0.01978	0.0187	0.01806	0.18217	0.04876	0.13145	0.02695	0.13153	0.02977	0.57855	0.80431	0.92372
0.63453	0.28912	0.02038	0.01892	0.01802	0.24794	0.05067	0.08941	0.02479	0.29552	0.02897	0.60694	1.23241	1.12731
0.7096	0.27892	0.01956	0.01914	0.0182	0.24427	0.04787	0.06733	0.02116	0.35476	0.03074	0.57105	0.94371	0.95819
0.75653	0.32934	0.01948	0.01913	0.01842	0.23309	0.04823	0.10826	0.01936	0.27335	0.02828	0.60632	1.23075	1.1708
0.5723	0.343	0.02027	0.0189	0.01852	0.30509	0.04996	0.10817	0.02461	0.07808	0.03042	0.59178	1.0121	0.94568
0.70185	0.30876	0.01966	0.01846	0.01818	0.30585	0.05065	0.10369	0.02498	0.11409	0.03081	0.63574	1.05008	1.1495
0.53437	0.32252	0.01946	0.01888	0.01834	0.16637	0.051	0.09348	0.02801	0.14477	0.0293	0.64609	1.0655	1.10944
0.77527	0.30185	0.01988	0.01881	0.01824	0.16746	0.04975	0.09481	0.02444	0.17724	0.0297	0.50968	1.03446	0.94064
0.64886	0.24758	0.01947	0.0189	0.01832	0.27124	0.04912	0.08886	0.0256	0.1234	0.0295	0.44237	1.13574	0.84056
0.46264	0.36821	0.02041	0.01874	0.01826	0.26627	0.04961	0.12261	0.02717	0.1705	0.03074	0.64738	1.31116	1.09737
0.72227	0.34426	0.0196	0.01877	0.01823	0.22637	0.05117	0.09471	0.02473	0.13498	0.03022	0.57674	0.98342	1.04516
0.64669	0.28474	0.0198	0.01882	0.01838	0.12058	0.05014	0.08571	0.02685	0.22414	0.02916	0.55228	1.17309	1.11719
0.60672	0.31261	0.01998	0.01871	0.01812	0.1708	0.04949	0.09855	0.02417	0.07912	0.02835	0.46526	1.24857	0.90196
0.66994	0.33084	0.01919	0.01898	0.01826	0.17801	0.04939	0.10798	0.02694	0.13057	0.02851	0.6182	1.15521	1.12714
0.63101	0.35112	0.01967	0.01906	0.01811	0.2393	0.05036	0.07717	0.02757	0.19221	0.02927	0.66775	1.00944	0.99105
0.52328	0.23654	0.0193	0.01921	0.01825	0.21583	0.05004	0.08806	0.02483	0.18393	0.03065	0.52644	0.98714	1.33418
0.67534	0.22345	0.01981	0.01906	0.01842	0.28226	0.05211	0.10222	0.02608	0.23346	0.02941	0.58778	1.14793	1.25534
0.56414	0.28984	0.01999	0.01886	0.0183	0.23176	0.04954	0.1228	0.02357	0.10932	0.03006	0.61004	0.99765	1.00297
0.60644	0.2039	0.01941	0.01865	0.01811	0.20823	0.05177	0.08596	0.02552	0.16024	0.02902	0.61036	1.05654	1.10842
0.48832	0.34658	0.01956	0.01863	0.0183	0.21102	0.04992	0.08404	0.02651	0.12697	0.03068	0.68737	1.1844	1.05867
0.55615	0.30851	0.0198	0.019	0.01825	0.22792	0.05155	0.10542	0.02419	0.18943	0.03052	0.61451	1.26085	1.18667
0.59237	0.36343	0.01948	0.01906	0.01842	0.27135	0.05084	0.11407	0.02365	0.2178	0.03146	0.64738	1.13624	0.9373
0.65138	0.31983	0.01954	0.01899	0.01827	0.20644	0.04955	0.11635	0.02662	0.00458	0.02936	0.57093	1.20537	1.37141
0.66232	0.3037	0.01959	0.01891	0.01821	0.22095	0.04829	0.10364	0.02569	0.16032	0.03056	0.58194	1.20015	1.04647
0.5381	0.32887	0.0193	0.01902	0.01849	0.11565	0.0517	0.07504	0.02524	0.26131	0.02859	0.61286	0.97148	1.22883
0.54566	0.28777	0.02008	0.01914	0.01825	0.30814	0.04963	0.11439	0.02454	0.30077	0.02958	0.52968	1.02794	1.17166
0.47675	0.26011	0.01955	0.0191	0.01832	0.19335	0.05363	0.08374	0.01938	0.10222	0.0299	0.58661	0.87065	0.85601
0.5231	0.28933	0.01999	0.01915	0.01817	0.25624	0.04867	0.09356	0.02598	0.16014	0.02912	0.55655	1.22121	1.02508
0.76646	0.35283	0.01936	0.01859	0.01802	0.28783	0.05035	0.11518	0.02628	0.19934	0.02938	0.53037	0.99605	1.30165
0.57889	0.35198	0.01962	0.01886	0.01825	0.22932	0.04955	0.09191	0.0217	0.05638	0.02972	0.59495	1.06325	1.16764
0.61942	0.34853	0.02035	0.01898	0.01828	0.33672	0.05093	0.1107	0.02294	0.168	0.03011	0.52167	1.12503	1.36834
0.57648	0.25892	0.02007	0.01907	0.01819	0.18815	0.04832	0.08321	0.02705	0.19065	0.02982	0.57428	0.92255	0.95942
0.52063	0.27088	0.02041	0.01909	0.01813	0.17315	0.04919	0.10256	0.02027	0.19643	0.0302	0.64479	1.22361	1.29334
0.72177	0.31938	0.01955	0.01825	0.01834	0.25127	0.04942	0.11678	0.0254	0.15392	0.02952	0.50498	1.06059	1.50864
0.7542	0.29826	0.01992	0.01898	0.01836	0.21687	0.05011	0.0586	0.0251	0.14408	0.0299	0.58535	0.91544	0.94886
0.60095	0.27405	0.01958	0.01892	0.01826	0.31679	0.0482	0.12719	0.02262	0.32037	0.0311	0.66593	1.08601	0.93962
0.62683	0.28802	0.01953	0.01877	0.01824	0.09478	0.04996	0.06878	0.02471	0.1604	0.02905	0.67694	1.10226	1.00151
0.60239	0.27439	0.01975	0.0185	0.01854	0.1666	0.05184	0.09663	0.02617	0.19938	0.02955	0.61889	1.19549	0.95111
0.56161	0.27021	0.01942	0.01886	0.01821	0.23724	0.0509	0.09432	0.027	0.05054	0.02867	0.5952	1.16478	1.23694
0.56457	0.40962	0.01957	0.01852	0.01815	0.08699	0.04931	0.0864	0.02427	0.33825	0.03033	0.52421	0.86579	1.00431
0.71713	0.39565	0.01939	0.01855	0.0185	0.27435	0.05084	0.116	0.02094	0.14614	0.031	0.53873	1.1918	1.13192
0.70409	0.23434	0.01975	0.01866	0.01849	0.23091	0.04784	0.08952	0.0241	0.05499	0.02884	0.49779	1.2205	1.12311
0.59059	0.30668	0.01976	0.01889	0.01848	0.25102	0.04806	0.11698	0.0205	0.1807	0.03037	0.63981	1.09077	1.22542
0.66871	0.24974	0.01978	0.01921	0.01799	0.31838	0.04762	0.10605	0.02312	0.20907	0.0293	0.63556	0.98	1.3755
0.67871	0.28019	0.0194	0.01908	0.01835	0.21524	0.0511	0.10194	0.02455	0.21405	0.02962	0.52097	1.13043	0.80878
0.64989	0.26059	0.0193	0.0191	0.0182	0.12194	0.05147	0.11345	0.02697	0.17155	0.02955	0.62572	0.88061	0.76061
0.47248	0.26977	0.01973	0.01864	0.01815	0.23956	0.04881	0.07623	0.02098	0.29324	0.02744	0.48615	0.94956	0.92898
0.58132	0.29701	0.01955	0.01881	0.01823	0.1985	0.0498	0.07434	0.0227	0.17357	0.03071	0.54669	1.20091	1.08739
0.58288	0.25362	0.02055	0.01899	0.01816	0.30106	0.04888	0.05866	0.03106	0.20064	0.02977	0.616	1.09145	1.06908
0.56696	0.33213	0.01938	0.01903	0.01799	0.13172	0.04985	0.09219	0.02549	0.29641	0.02949	0.66426	0.99002	0.89686
0.72963	0.30714	0.0195	0.01872	0.01813	0.21258	0.0491	0.09046	0.02765	0.03862	0.03082	0.5417	0.94454	1.22403
0.6829	0.26027	0.01985	0.01886	0.01826	0.19184	0.04905	0.12362	0.0216	0.27523	0.02955	0.59701	1.14755	1.11484
0.50014	0.32348	0.01969	0.01844	0.01837	0.24595	0.0502	0.08917	0.01957	0.33859	0.03139	0.52896	1.25995	0.88149
0.66065	0.24935	0.02036	0.01908	0.018	0.18785	0.05427	0.0909	0.02236	0.25481	0.0288	0.61919	1.06641	1.18783
0.64276	0.27005	0.01968	0.01906	0.01862	0.17533	0.04763	0.0898	0.02264	0.27247	0.0296	0.60129	1.06658	0.96305
0.6787	0.27272	0.01931	0.0188	0.01807	0.33409	0.04996	0.10432	0.02798	0.20678	0.03044	0.67381	1.11416	1.37762
0.59621	0.32271	0.01994	0.01875	0.01835	0.26323	0.04747	0.08357	0.02664	0.13665	0.02972	0.53681	1.03071	1.12347
0.58937	0.27847	0.01943	0.01888	0.01815	0.24297	0.0503	0.09274	0.02409	0.00991	0.02863	0.53305	1.06115	1.01908
0.45074	0.27096	0.0198	0.01897	0.01809	0.21592	0.04931	0.09963	0.02908	0.11804	0.02871	0.64769	1.32591	0.9944
0.59517	0.23409	0.01996	0.01881	0.01854	0.19757	0.05054	0.07783	0.0214	0.21606	0.031	0.55753	0.98993	1.13997
0.8273	0.25247	0.01995	0.01884	0.01799	0.33615	0.05058	0.12272	0.02451	0.17056	0.03028	0.63922	0.96201	0.93321
0.46193	0.39019	0.01971	0.01892	0.01814	0.32087	0.04865	0.08938	0.02488	0.03697	0.02907	0.56864	1.10203	0.86995
0.51334	0.28262	0.01935	0.01906	0.01849	0.31793	0.04937	0.07879	0.02312	0.26419	0.0305	0.60536	1.22958	1.0659
0.54749	0.20619	0.02021	0.01873	0.01822	0.13508	0.05267	0.11152	0.02629	0.31703	0.03062	0.60186	1.17669	0.93962
0.63469	0.35998	0.01939	0.01903	0.01819	0.15443	0.04628	0.08821	0.02395	0.20781	0.02988	0.54445	0.8074	1.12886
0.67244	0.26439	0.01915	0.01841	0.01807	0.33	0.05219	0.10811	0.02985	0.29128	0.03112	0.62211	1.18283	1.20946
0.5214	0.26209	0.02008	0.01867	0.01846	0.14376	0.04929	0.07875	0.02392	0.16191	0.03033	0.59481	0.98451	1.19765
0.64412	0.23294	0.01993	0.01897	0.01843	0.18296	0.0499	0.10142	0.02562	0.24485	0.03064	0.67926	0.80839	1.18988
0.62629	0.32993	0.02034	0.01861	0.01809	0.17202	0.05033	0.10914	0.02576	0.08581	0.03067	0.46751	1.07425	1.06908
0.64368	0.27409	0.01986	0.01876	0.01834	0.19312	0.0472	0.08118	0.02053	0.19793	0.03026	0.58327	1.02255	1.03542
0.56833	0.2443	0.01988	0.01912	0.01837	0.27758	0.05012	0.09585	0.02493	0.27682	0.02898	0.6336	1.0874	1.00864
0.44957	0.23723	0.02004	0.01857	0.01797	0.14847	0.0501	0.0908	0.02555	0.22312	0.0292	0.53597	0.9818	1.2508
0.6463	0.28269	0.01975	0.019	0.01815	0.15149	0.05126	0.09654	0.03056	0.10562	0.02873	0.62515	1.0259	1.07992
0.45614	0.24186	0.02054	0.0188	0.01799	0.17442	0.05154	0.0876	0.02458	0.26748	0.02999	0.62176	1.16176	1.29288
0.6861	0.23828	0.01944	0.01861	0.01818	0.15853	0.05191	0.09142	0.02464	0.17955	0.02987	0.63162	1.13997	1.00723
0.7144	0.26376	0.01987	0.01881	0.01791	0.20726	0.05019	0.07819	0.02457	0.22908	0.03064	0.57018	1.39389	1.09785
0.47021	0.24075	0.01957	0.01868	0.01831	0.27658	0.05094	0.10466	0.03022	0.25384	0.02897	0.70644	1.27452	1.16431
0.64263	0.29373	0.0199	0.01932	0.01834	0.19012	0.04847	0.11162	0.02493	0.04039	0.02924	0.64637	0.93962	1.06556
0.66694	0.28555	0.02006	0.01889	0.01839	0.13151	0.05141	0.07358	0.02573	0.24766	0.03164	0.66038	1.09953	0.95769
0.58033	0.18951	0.0192	0.01931	0.01831	0.23994	0.04971	0.07701	0.02303	0.23283	0.02933	0.63989	0.9896	1.31738
0.63978	0.22874	0.01963	0.01893	0.01819	0.25369	0.04931	0.08183	0.02405	0.11745	0.02997	0.64864	1.21879	1.15727
0.59983	0.31086	0.01973	0.01898	0.01833	0.23785	0.04765	0.08378	0.02513	0.02516	0.03049	0.62216	0.97851	0.75583
0.60552	0.25818	0.0195	0.01887	0.01843	0.21508	0.05233	0.06992	0.02299	0.35743	0.03108	0.5503	0.97803	1.00502
0.55235	0.36298	0.02007	0.01838	0.01838	0.25209	0.04897	0.08968	0.02643	0.11984	0.02992	0.54287	1.07491	1.01285
0.53427	0.27242	0.01976	0.01892	0.01834	0.27069	0.04991	0.08879	0.02409	0.16687	0.02849	0.5111	0.97691	0.94095
0.50994	0.26641	0.01964	0.01894	0.01795	0.10257	0.05167	0.09922	0.02578	0.29114	0.02894	0.62793	0.88489	1.03793
0.64458	0.29412	0.02005	0.01878	0.01845	0.20002	0.05142	0.11672	0.02378	0.26007	0.0287	0.58505	0.98149	1.06877
0.82529	0.2724	0.01986	0.01892	0.01833	0.17545	0.04943	0.11928	0.02558	0.24094	0.03053	0.54564	0.8859	1.20946
0.63339	0.29721	0.01993	0.01883	0.01837	0.29072	0.04817	0.09928	0.02595	0.09947	0.02986	0.58185	0.76644	0.92986
0.47823	0.35857	0.01991	0.01851	0.01822	0.11816	0.04838	0.12699	0.02513	0.19808	0.03042	0.6136	1.00812	1.20432
0.50006	0.38405	0.0197	0.01889	0.01821	0.13738	0.04935	0.09705	0.024	0.15593	0.03045	0.49378	1.03904	1.2145
0.53532	0.25312	0.01987	0.01931	0.01804	0.15189	0.05224	0.09246	0.02615	0.28074	0.0295	0.53179	0.94073	1.0276
0.57011	0.26876	0.01945	0.01894	0.01828	0.36306	0.05017	0.10777	0.02807	0.19798	0.03013	0.62002	1.32901	0.95232
0.63371	0.24162	0.01995	0.01893	0.01814	0.21683	0.05159	0.09438	0.02691	0.2339	0.02976	0.71674	0.82311	1.22019
0.70787	0.24316	0.01956	0.01901	0.01783	0.31854	0.05163	0.09662	0.02537	0.19658	0.0286	0.59551	0.86871	1.05818
0.57	0.22978	0.01978	0.01894	0.01856	0.23537	0.04916	0.12068	0.02413	0.21459	0.03043	0.49814	1.09648	1.15942
0.479	0.2294	0.01935	0.01856	0.0185	0.19753	0.04861	0.08496	0.02255	0.21608	0.02961	0.67727	0.78381	1.36631
0.52329	0.3214	0.01952	0.01892	0.01818	0.25931	0.05011	0.13498	0.02618	0.00887	0.02883	0.51279	1.04084	0.90319
0.50237	0.32973	0.01922	0.0191	0.01824	0.35875	0.0507	0.08128	0.02609	0.13511	0.02906	0.47359	1.21682	0.94587
0.34686	0.28723	0.01988	0.01866	0.01805	0.19815	0.04972	0.09291	0.02793	0.46707	0.03028	0.53758	1.21415	1.15266
0.55537	0.2452	0.01975	0.01868	0.01822	0.18027	0.05014	0.08995	0.02617	0.07578	0.03123	0.54291	1.05218	0.94467
0.70882	0.24866	0.01988	0.01876	0.01835	0.19505	0.04814	0.09316	0.02539	0.19176	0.02911	0.6327	1.03483	1.16396
0.53223	0.34715	0.01949	0.01881	0.01825	0.15964	0.04824	0.09518	0.02782	0.28643	0.02993	0.5239	1.06178	1.28179
0.62694	0.26363	0.01985	0.01892	0.01854	0.27286	0.04985	0.08744	0.02478	0.20962	0.03143	0.66863	1.12447	1.44033
0.65117	0.2847	0.01933	0.01881	0.01826	0.31631	0.05097	0.10507	0.02531	0.21816	0.0291	0.59228	1.3054	0.98157
0.67718	0.21245	0.01928	0.01872	0.01837	0.17838	0.04965	0.10973	0.02193	0.30263	0.02992	0.60593	1.05394	0.97496
0.57554	0.31155	0.02004	0.0187	0.01827	0.23242	0.04733	0.1194	0.02823	0.11322	0.03127	0.58655	1.01579	1.01499
0.6045	0.24999	0.02006	0.01903	0.01824	0.23108	0.04969	0.10078	0.02112	0.12767	0.02911	0.716	1.31885	1.09997
0.50992	0.31166	0.01978	0.01893	0.0184	0.14231	0.05021	0.11619	0.02535	0.2245	0.03039	0.51879	1.05787	1.01036
0.5381	0.30644	0.0202	0.01898	0.01811	0.28573	0.04959	0.09555	0.02542	0.17112	0.03156	0.50038	1.08474	0.83389
0.60312	0.29229	0.01952	0.01882	0.01836	0.23451	0.04699	0.136	0.02619	0.31388	0.0301	0.64516	0.95875	0.97268
0.5644	0.27109	0.0195	0.01886	0.01818	0.23178	0.0501	0.10098	0.02598	0.3297	0.03253	0.66446	1.29321	1.36264
0.56925	0.37346	0.01982	0.0189	0.01824	0.24463	0.04894	0.09403	0.02623	0.24776	0.03181	0.57884	0.94334	0.99698
0.67468	0.3032	0.0195	0.01877	0.01821	0.18164	0.04994	0.09671	0.02407	0.12134	0.03063	0.65099	1.06053	1.17651
0.59289	0.26967	0.0203	0.01914	0.01815	0.24216	0.04911	0.09184	0.02917	0.01373	0.03064	0.71072	0.9394	0.93809
0.50336	0.36951	0.02009	0.01849	0.01853	0.19534	0.0484	0.09345	0.02595	0.26379	0.02912	0.56305	0.87783	1.20418
0.65189	0.33677	0.01961	0.01905	0.01844	0.11945	0.05104	0.08093	0.02815	0.19661	0.03028	0.64715	1.15773	0.88509
0.58386	0.40227	0.01918	0.01852	0.01817	0.06291	0.04866	0.09986	0.02461	0.09436	0.02985	0.50926	1.0585	0.79617
0.59736	0.27447	0.01999	0.01913	0.01836	0.14248	0.05153	0.08082	0.02562	0.18083	0.02994	0.6278	0.94844	0.98848
0.56489	0.33012	0.01948	0.01906	0.01834	0.25521	0.05084	0.10697	0.02645	0.18064	0.03201	0.54965	0.95672	0.95007
0.6844	0.32276	0.01954	0.0189	0.01816	0.17355	0.04626	0.09789	0.02438	0.22974	0.02884	0.60659	0.89481	1.20879
0.49185	0.30749	0.02031	0.01894	0.0182	0.29225	0.04963	0.0849	0.0264	0.3132	0.03121	0.48105	1.24851	1.09349
0.63216	0.25385	0.01958	0.01893	0.01813	0.12554	0.04631	0.11309	0.02076	0.31443	0.0301	0.50872	0.82652	0.82672
0.62505	0.26896	0.01983	0.01885	0.01819	0.2339	0.0496	0.10367	0.02159	0.13479	0.02887	0.55298	0.99909	0.98489
0.63773	0.3225	0.01976	0.01891	0.01808	0.22759	0.05006	0.08833	0.02111	0.16746	0.02925	0.6094	0.96776	0.90018
0.62756	0.53742	0.01979	0.0194	0.01806	0.21997	0.0529	0.08589	0.02676	0.17802	0.03136	0.6306	1.09701	1.13861
0.69534	0.25483	0.01975	0.01875	0.01808	0.14139	0.04985	0.11352	0.02366	0.06151	0.02982	0.58797	0.72392	1.12632
0.68897	0.27875	0.02007	0.01894	0.01817	0.26858	0.04933	0.07878	0.0287	0.16027	0.0307	0.53244	1.15692	1.2302
0.49541	0.37179	0.0199	0.01909	0.01819	0.19781	0.05143	0.11123	0.02103	0.14642	0.03057	0.53607	1.10674	1.2097
0.53132	0.31618	0.02018	0.01912	0.0182	0.27443	0.05114	0.10109	0.0235	0.04622	0.03011	0.65633	0.98008	1.19939
0.6157	0.32636	0.01986	0.0187	0.01814	0.11769	0.05096	0.08739	0.02365	0.33861	0.02875	0.50853	1.08056	1.20686
0.57432	0.33746	0.01995	0.01894	0.01808	0.27727	0.0485	0.08051	0.02393	0.16859	0.02939	0.64566	0.89277	1.11761
0.77352	0.26719	0.01974	0.01868	0.01857	0.22857	0.05197	0.08477	0.02035	0.39098	0.02995	0.54628	1.0783	1.30737
0.56957	0.32896	0.02041	0.01878	0.01778	0.17671	0.04993	0.09533	0.02481	0.23037	0.02959	0.54059	1.19027	0.93325
0.59021	0.36077	0.02019	0.01883	0.01853	0.26379	0.0502	0.07509	0.02771	0.28904	0.02901	0.60652	0.90917	1.08521
0.63691	0.29145	0.0203	0.01895	0.01809	0.25818	0.05199	0.08146	0.0258	0.01151	0.02931	0.66321	1.14688	1.30024
0.60586	0.25055	0.0198	0.01924	0.01818	0.25255	0.04888	0.09418	0.02914	0.3789	0.03009	0.60245	0.92659	1.16461
0.68378	0.3265	0.01968	0.01886	0.01802	0.24785	0.05182	0.11546	0.02745	0.118	0.03144	0.65414	0.83402	1.18106
0.59617	0.32263	0.01992	0.01847	0.01824	0.14823	0.05057	0.09176	0.0222	0.19363	0.02995	0.59765	1.20188	0.72019
0.61853	0.30326	0.0196	0.01894	0.01835	0.20062	0.05189	0.10899	0.02451	0.18944	0.02987	0.5214	1.15256	1.19793
0.57535	0.25968	0.01966	0.01895	0.01824	0.25113	0.04977	0.12222	0.02385	0.14732	0.02824	0.62531	0.89266	1.27942
0.62672	0.38364	0.01975	0.01876	0.01825	0.2408	0.04887	0.11049	0.02719	0.18197	0.03117	0.59611	1.02429	1.03415
0.61882	0.288	0.01877	0.01925	0.01837	0.26561	0.04886	0.10456	0.02324	0.20035	0.02893	0.61008	1.18452	1.263
0.578	0.31581	0.01961	0.01893	0.01843	0.26104	0.04971	0.10056	0.02875	0.09281	0.02957	0.62781	1.18486	0.83843
0.48442	0.23654	0.0195	0.01888	0.01854	0.19235	0.04934	0.0879	0.02352	0.17911	0.02984	0.57604	1.08147	0.96106
0.6211	0.23776	0.02031	0.01854	0.01828	0.22556	0.05176	0.09026	0.02722	0.10685	0.03115	0.46886	1.02074	1.25112
0.49203	0.30261	0.01923	0.01893	0.01846	0.23094	0.05211	0.09876	0.0217	0.08262	0.02962	0.69148	1.30798	1.20291
0.62053	0.27737	0.02011	0.0188	0.01806	0.25193	0.0505	0.10474	0.02515	0.1174	0.02832	0.55559	1.09906	0.82928
0.53386	0.27522	0.01984	0.01888	0.01815	0.15287	0.05028	0.10797	0.02835	0.38295	0.02807	0.53654	1.20407	1.09311
0.53958	0.29891	0.01948	0.01913	0.01813	0.18304	0.05106	0.10713	0.02275	0.2979	0.02998	0.67165	1.03654	1.35489
0.58639	0.30437	0.02032	0.01894	0.01837	0.23082	0.0493	0.12158	0.02445	0.24226	0.03004	0.65357	1.01914	0.87855
0.71911	0.30838	0.02067	0.01898	0.01842	0.17807	0.04945	0.08068	0.02576	0.24078	0.03092	0.57421	0.74922	0.97792
0.46226	0.40754	0.01958	0.01924	0.01825	0.25623	0.04859	0.09167	0.02359	0.16879	0.0296	0.49881	0.91642	1.14321
0.66229	0.32553	0.0199	0.01884	0.01844	0.22176	0.05041	0.09029	0.02367	0.11881	0.03149	0.54267	0.94095	0.88583
0.51075	0.21912	0.01972	0.01868	0.01836	0.25146	0.04721	0.11795	0.02439	0.37352	0.02929	0.5137	1.14937	1.31567
0.58258	0.24521	0.02038	0.01861	0.01837	0.13765	0.04923	0.10168	0.02451	0.30515	0.03065	0.69897	1.32146	0.95392
0.74782	0.30277	0.02	0.01895	0.01837	0.3039	0.0509	0.11288	0.02377	0.22768	0.02961	0.54585	1.15018	1.12645
0.51632	0.33138	0.02014	0.0185	0.01817	0.21036	0.04875	0.09769	0.02312	0.3241	0.03014	0.67457	1.20663	1.26795
0.65393	0.28724	0.0194	0.0193	0.01817	0.20201	0.04841	0.12056	0.02349	0.14138	0.03033	0.60528	1.00062	1.05429
0.76342	0.29831	0.02	0.01826	0.01839	0.28288	0.04594	0.09805	0.02017	0.13065	0.03118	0.45439	0.97931	1.03192
0.56948	0.34158	0.01942	0.01918	0.01845	0.26547	0.05078	0.10332	0.02652	0.38981	0.02972	0.55083	1.41783	1.41413
0.56367	0.30503	0.01892	0.01883	0.01836	0.22281	0.04933	0.09923	0.02625	0.18523	0.03007	0.48924	0.98847	0.95396
0.58925	0.20098	0.01988	0.01846	0.01814	0.22471	0.04868	0.11103	0.02264	0.00739	0.02835	0.53738	1.1245	1.35559
0.68107	0.34397	0.0201	0.01908	0.01841	0.27901		0.11282	0.02734	0.27856	0.03079		1.19177
0.52007	0.24845	0.01943	0.01865	0.01809	0.16081		0.08238	0.02265	0.09461	0.02905		0.93021
0.68107		0.0201	0.01908	0.01841	0.27901			0.02734		0.03079		1.19177
0.52007		0.01943	0.01865	0.01809	0.16081			0.02265		0.02905		0.93021
		0.0201	0.01908	0.01841	0.27901			0.02734		0.03079		1.19177
		0.01943	0.01865	0.01809	0.16081			0.02265		0.02905		0.93021
		0.0201	0.01887	0.01841	0.27901			0.02734		0.03079		1.19177
		0.01943		0.01809	0.16081			0.02265		0.02905		0.93021
		0.0201		0.01841	0.27901			0.02734		0.03079		1.19177
		0.01943		0.01809	0.16081			0.02265		0.02905		0.93021
		0.0201		0.01841	0.27901					0.03079		1.19177
		0.01943		0.01809	0.16081					0.02905		0.93021
		0.0201		0.01841	0.27901					0.03079		1.06099
		0.01943		0.01809	0.16081					0.02905
		0.0201		0.01841	0.27901					0.03079
		0.01943		0.01809	0.16081					0.02905
		0.0201		0.01841	0.27901					0.03079
		0.01943		0.01809	0.16081					0.02905
		0.0201			0.21991					0.03079
		0.01943								0.02905
		0.0201								0.03079
		0.01943								0.02905
		0.0201
		0.01943

## Sheet: Fig1h=Fig S12
				time	1min		5 min		10 min		2.2kpa		1.6kpa		13.0kpa
				10	401.838	54.9748	53.9747	9.01528	0.39084	0.05809	0.29683	0.04127	0.16288	0.0252	19.8201	9.33535
				20	806.952	94.2349	107.965	19.5996	0.7796	0.10581	0.49691	0.08656	0.31685	0.03789	240.822	71.0489
				30	1204.99	185.009	161.82	21.2429	1.15748	0.14618	0.81338	0.1148	0.49179	0.06168	460.54	120.076
				40	1615.26	240.407	214.811	37.0234	1.53795	0.27763	1.0265	0.1388	0.64794	0.09989	694.037	158.249
				50	2010.39	240.143	270.259	43.3044	1.92683	0.33608	1.31509	0.18146	0.82031	0.14719	909.977	169.656
				60	2400.86	439.108	322.686	57.3758	2.32109	0.33319	1.58647	0.2798	0.96925	0.13088	1102.21	174.288
				70	2818.3	439.651	379.191	54.4183	2.71031	0.3365	1.85294	0.21272	1.11009	0.18385	1321.59	249.781
				80	3196.49	390.779	431.524	61.8816	3.08646	0.50551	2.02483	0.27601	1.2843	0.19854	1586.56	305.321
				90	3631.88	551.276	484.291	55.2059	3.46678	0.56706	2.30891	0.30688	1.4367	0.21994	1774.02	246.585
				100	4010	736.652	540.182	85.4776	3.84385	0.61855	2.58653	0.33018	1.61326	0.24446	2010.39	295.499
				110	4396.15	510.49	596.716	110.872	4.24485	0.5643	2.81213	0.3571	1.78368	0.28735	2177.37	276.846
				120	4802.61	561.625	645.047	110.679	4.64118	0.54591	3.0878	0.36013	1.93671	0.33129	2431.33	486.642
				130	5219.79	976.85	702.191	84.8796	5.00411	0.79768	3.43697	0.42118	2.08261	0.25214	2701.08	462.377
				140	5628.65	646.416	753.546	117.499	5.37539	0.87064	3.58034	0.57874	2.25631	0.33572	2861.78	349.447
				150	6011.58	1108.49	803.26	100.614	5.7858	0.82679	3.87417	0.53954	2.42945	0.4526	3147.78	452.559
				160	6402.99	872.155	870.021	129.149	6.20498	0.79298	4.14819	0.5027	2.56771	0.41724	3328.29	650.738
				170	6817.06	1064.96	912.613	137.81	6.53811	0.92537	4.38739	0.62529	2.74666	0.40331	3584.04	622.695
				180	7218.7	1113.87	971.159	140.366	6.92178	1.10866	4.61159	0.71468	2.91707	0.52754	3719.91	548.495
				190	7607.05	976.642	1023.95	171.522	7.33569	0.9654	4.98587	0.62043	3.0575	0.54307	3842.13	724.58
				200	8002.31	1065.8	1085.16	134.64	7.7421	1.35306	5.23125	0.61451	3.22164	0.48554	4197.73	615.644
				210	8459.73	1559.06	1133.74	151.426	8.06951	1.17996	5.42033	0.67219	3.33445	0.43008	4432.84	686.565
				220	8812.25	1273.6	1189.46	144.364	8.44684	1.10306	5.6055	0.93408	3.51281	0.64715	4627.08	777.554
				230	9234.7	1139.86	1245.52	181.568	8.90447	1.24836	5.98264	0.76591	3.6936	0.65813	4964.73	606.574
				240	9648.46	1145.14	1288.25	235.228	9.19695	1.56688	6.07841	0.84845	3.89682	0.58354	5109.96	990.598
				250	10067.1	1853.22	1343.31	169.767	9.63131	1.1076	6.48227	1.21487	4.01032	0.63316	5357.24	775.016
				260	10451	1630.07	1400.28	179.373	10.0375	1.41964	6.70834	1.11599	4.22721	0.67687	5509.4	745.981
				270	10864.9	1792.71	1453.58	231.586	10.4092	1.5855	7.10872	0.94977	4.33249	0.54188	5727.66	861.65
				280	11252	1640.19	1512.36	262.808	10.7915	1.72167	7.19423	1.21058	4.55283	0.84844	5967.15	903.617
				290	11642.6	1512.6	1561.71	253.717	11.177	1.75654	7.46388	1.01312	4.69708	0.53721	6049.52	753.13
				300	12091.4	1597.1	1615.08	193.48	11.5921	2.0941	7.65999	1.16067	4.87322	0.58504	6351.99	1012.16
				310	12390.6	1555.83	1668.21	300.76	11.8801	1.59163	8.16038	1.21885	4.91358	0.58439	6559.48	1205.98
				320	12847.6	1542.11	1728.47	290.382	12.3501	1.90937	8.16535	1.00144	5.13525	0.65944	6714.96	1151.56
				330	13252.2	1695.97	1780.97	225.036	12.7114	2.34999	8.60224	1.50095	5.36178	0.90596	6970.81	906.223
				340	13589.1	2410.43	1829.17	341.735	13.1032	1.73818	8.75564	1.55022	5.48863	0.87498	7322.55	1007.46
				350	14045.7	2245.26	1884.96	212.284	13.4975	1.93809	9.11091	1.18706	5.6601	0.91313	7511.13	1080.25
				360	14387.4	2596.47	1938.23	300.184	13.8244	2.27809	9.3168	1.27858	5.8406	1.04411	7650.79	1419.18
				370	14885.1	2225.3	1992.46	275.469	14.2996	2.14888	9.40178	1.5585	5.88064	0.86462	7927.89	1020.33
				380	15285.5	2041.34	2051.84	305.83	14.7052	1.92727	9.82071	1.82399	6.04579	0.71963	8271.65	1563.18
				390	15624.8	2694.29	2109.92	361.064	15.0167	1.84555	10.0796	1.16267	6.33303	0.95867	8490.3	1432.99
				400	16064.3	2325.48	2153.54	339.223	15.3819	1.96902	10.4383	1.88583	6.4443	1.15401	8262.25	1364.43
				410	16453.8	1870.09	2216.64	359.545	15.6897	2.04902	10.6125	1.94033	6.59611	0.81751	8770.04	1251.62
				420	16951.1	2905.07	2276.87	347.944	16.2198	2.40843	11.0161	1.72562	6.70102	0.94407	9038	1187.62
				430	17304.3	3006.83	2316.62	343.289	16.5635	2.38428	10.8148	1.43794	6.86811	0.89129	9354.11	1251.19
				440	17706.9	2608.37	2377.65	381.645	16.9706	2.13153	11.1931	1.7019	7.0721	0.92385	9430.23	1789.39
				450	18033	2143.83	2414.91	338.358	17.3237	2.62671	11.6546	2.17548	7.27107	1.31465	9924.89	1348.73
				460	18314.2	2713.35	2483.43	315.088	17.6896	2.69618	11.9886	1.40373	7.26257	1.28301	9686.25	1545.23
				470	18898.1	2957.53	2551.66	380.783	18.1329	2.16079	12.1428	1.94507	7.47048	1.14777	10074	1325.57
				480	19318.8	2280.69	2568.64	374.988	18.4145	3.31194	12.3911	1.90574	7.64283	1.35639	10450.1	1632.48
				490	19712.6	2425.25	2642.25	298.515	18.9604	2.76399	12.7421	1.92174	7.98575	1.34693	10559.2	1315.39
				500	20028.4	3346.37	2699.31	411.149	19.3688	2.18748	12.959	2.42288	8.05722	0.92578	10776.7	1984.28
				510	20477.7	2792.41	2736.83	362.061	19.6799	2.3846	12.9297	1.96331	8.18045	1.46955	11261.3	1798.84
				520	20816.2	3722.59	2802.1	499.256	20.1826	2.97475	13.5043	1.59387	8.344	1.3365	11132.3	1430.99
				530	21326.4	3946.28	2852.83	460.356	20.5351	3.29623	13.768	1.94742	8.44827	1.45255	11495.8	2106.34
				540	21687	2997.52	2907.14	408.602	20.7801	3.44401	13.7636	1.73374	8.70002	1.39559	11670.4	1679.64
				550	21985.7	3669.24	2962.22	336.677	21.2256	3.55444	13.9865	1.96047	8.75102	1.49865	11949.9	1588.24
				560	22457.5	3288.89	3010.66	392.95	21.5459	2.44784	14.4908	2.56949	8.8878	1.15884	11806.9	1765.03
				570	22980.1	4219.39	3076.17	411.013	21.9798	2.60631	14.7788	1.7325	9.10056	1.53687	11999.7	1408.1
				580	23369.8	3053.71	3108.23	522.177	22.4129	3.63658	15.0235	1.8127	9.34716	1.12013	12886.7	2111.42
				590	23808.5	3888.68	3185.37	500.212	22.8127	4.13232	15.209	2.60477	9.5008	1.2261	12499.2	2359.79
				600	24046.1	3626.74	3229.51	537.056	23.2405	4.08021	15.0885	1.91516	9.67091	1.22899	12809.9	1669.46
				610	24513.1	3256.48	3293.74	475.298	23.578	3.00733	15.9229	2.47136	9.73414	1.16173	13081.8	2071.84
				620	24875.7	4522.11	3341.92	588.139	23.8412	2.95835	16.0758	2.09453	10.0664	1.56847	13166.6	2204.92
				630	25380.5	4483.52	3391.81	570.44	24.1872	3.14977	16.2412	2.61045	10.2058	1.15617	13761.7	2136.67
				640	25817.9	3049.34	3463.94	535.604	24.7095	3.54742	16.4352	2.19468	10.3358	1.29549	13937.4	2291.57
				650	26054.5	4864.6	3498.16	491.85	25.1806	4.13434	16.8008	2.38577	10.484	1.84962	13937.8	1991.22
				660	26550.4	3561.04	3555.88	597.961	25.3463	4.27737	17.1608	2.93866	10.5236	1.47105	14192.9	2322.43
				670	26954.2	3796.55	3631.58	659.807	25.7109	3.17954	17.442	3.07184	10.6415	1.57444	14438.6	2520.07
				680	27318.5	3283.84	3670.36	579.314	26.2987	4.64677	17.0889	2.76516	10.9844	1.56901	14503.2	2379.32
				690	27868.7	3967.24	3705.51	645.973	26.6226	4.66345	17.6621	2.37837	11.1945	1.95893	15106	2409.29
				700	28191.6	4289.1	3777.94	660.261	26.8631	3.96942	17.7664	2.28381	11.1402	1.965	15118.2	2843.61
				710	28460.5	5128.54	3816.69	543.695	27.3402	4.34043	18.2964	2.51773	11.4009	1.54094	15271.1	2476.26
				720	28770.2	4222.5	3888.09	676.022	27.745	4.64254	18.7371	2.85284	11.6065	1.6082	15693.4	2643.34

## Sheet: Fig1j
T (min)
10	7.25139	1.21422
20	14.4369	1.8421
30	21.6712	3.77374
40	28.9216	4.5983
50	36.1508	5.82095
60	43.3998	8.08421
70	50.6586	6.82945
80	57.8882	10.5927
90	65.1064	7.81052
100	72.3532	10.0752
110	79.4502	13.111
120	86.6274	16.0933
130	94.0376	12.5343
140	101.242	18.1545
150	108.473	13.6563
160	115.599	20.6981
170	122.881	22.7452
180	130.129	23.4679
190	137.282	19.6523
200	144.613	20.1124
210	151.987	17.8712
220	159.08	23.7552
230	166.23	21.6985
240	173.567	27.3729
250	180.835	24.934
260	187.97	28.9717
270	195.164	31.1808
280	202.438	26.8152
290	209.878	32.8577
300	217.106	34.0739
310	224.244	31.5216
320	231.553	26.4633
330	238.598	30.0765
340	246.164	36.3831
350	253.098	38.3185
360	260.293	40.51
370	263.621	34.2623
380	264.09	31.2156
390	264.216	39.4385
400	264.441	42.6077
410	264.591	41.1256
420	265.221	35.3307
430	265.478	37.9259
440	266.327	42.2491
450	266.837	45.7657
460	267.835	42.927
470	268.332	40.9591
480	268.59	39.9586
490	269.691	35.1464
500	269.782	46.5022
510	270.984	30.723
520	271.609	41.6888
530	271.934	48.0993
540	272.785	43.423
550	273.457	35.7133
560	274.014	34.7741
570	274.928	40.8266
580	275.193	35.2414
590	275.274	32.3745
600	275.582	43.5382
610	276.847	50.0898
620	278.226	44.1063
630	278.248	50.633
640	279.154	48.4797
650	279.399	50.436
660	281.053	49.1765
670	281.425	46.4789
680	281.537	39.7844
690	282.144	38.5322
700	282.454	49.9728
710	282.798	50.5448
720	283.577	33.6012

## Sheet: Fig2b
Time	cycle	13.0kPa	2.2kPa	1.6kPa
10	1500.14	3944.31	1578.44	1589.02
20	1525.98	3587.15	1770.83	1289.5
30	1733.84	4162.5	1651.14	1354.95
40	3658.19	4430.05	1540.2	1289.79
50	2988.33	3805.35	1538.55	1547.25
60	3519.36	3535.2	1433.43	1404.05
70	2474.66	4063.8	1763.53	1416.48
80	1994.92	3035.18	1402.76	1379.2
90	1944.79	3787.16	1482.75	1293.72
100	1855.32	3126.09	1674.73	1349.18
110	1634.73	3504.03	1475.74	1544.08
120	1534.47	3985.87	1741.49	1495.25
130	1749.65	4200.17	1463.25	1692.89
140	1851.08	4001.46	1574.24	1569.51
150	1696.05	4493.69	1570.79	1499.45
160	542.597	4245.63	1694.4	1270.31
170	1197.42	3513.12	1613.85	1402.53
180	1214.38	3700.15	1702.7	1563.52
190	1382.14	3249.48	1545.45	1782.33
200	1650.54	4567.72	1744.61	1518.81
210	1632.42	3489.75	1654.91	1576.25
220	1525.98	3802.75	1647.11	1581.82
230	1961.37	3961.2	1803.17	1241.67
240	1015.39	4337.84	1615.77	1319.38
250	1112.96	4358.62	1682.21	1423.88
260	1249.48	3789.76	1762.62	1377.89
270	1271.84	4649.54	1812.43	1391.23
280	1168.88	3622.22	1771.54	1521.96
290	1429.96	4635.25	1614.41	1435.08
300	1621.62	4601.49	1714.15	1378.97
310	1719.57	3743.01	1980.78	1589.91
320	1911.62	5050.86	1332.48	1372.61
330	1719.57	4131.33	1655.36	1546.49
340	1591.15	4493.69	1787.32	1448.55
350	2021.92	3294.93	1697.16	1397.84
360	2535.98	3505.33	1568.37	1389.94
370	3021.5	3144.28	1366.9	1568.31
380	2143.01	2971.54	1657.89	1523.38
390	2591.12	3640.4	1598.06	1312.02
400	2580.32	4197.57	1494.3	1517.14
410	2809.01	4198.87	1487.82	1637.03
420	2312.3	2974.14	1515.29	1173.19
430	2821.35	3322.21	1855.65	1455.22
440	2657.45	3856	1475.6	1333.72
450	1165.02	3497.54	1666.62	1476.42
460	1670.98	3654.74	1456.02	1196.03
470	1588.84	4357.36	1590.05	1308.7
480	1843.75	4358.66	1515.93	1477.37
490	1785.13	3880.72	1633.99	1258.88
500	2148.02	4452.17	1662.59	1427.57
510	2095.96	4826.22	1593.97	1505.19
520	2502.81	5156.1	1806.54	1270.19
530	2783.56	5197.66	1416.67	1485.29
540	2679.05	4857.39	1514.99	1361.08
550	3055.05	4793.75	1623.31	1386.05
560	905.099	4606.73	1746.85	1368.72
570	892.373	4779.46	1646	1612.14
580	962.946	4006.7	1603.28	1466.6
590	1170.03	4528.8	1571.91	1362.01
600	1333.93	4750.89	1666.88	1647.05
610	1455.02	5450.92	1327.2	1709.43
620	1634.35	4762.58	1616.65	1591.73
630	1479.32	4708.03	1531.01	1169.14
640	1450.78	4209.31	1400.93	1615.88
650	1777.03	5163.89	1632.34	1297.56
660	2149.18	4918.43	1426.07	1445.43
670	2357.42	4261.26	1722.09	1140.37
680	2740.36	4241.77	1736.17	1351.68
690	2723.78	4956.09	1536.67	1380.3
700	3260.59	4658.68	1408.61	1332.03
710	2804.77	4969.08	1643.55	1533.45
720	2842.17	4244.37	1541.23	1487.77
730	2893.46	4443.08	1896.65	1574.28
740	3002.22	3840.46	1670.12	1249.9

## Sheet: Fig2c
Time	cycle	13.0kPa	2.2kPa	1.6kPa
10	0.306	0.34029	0.575918	0.533646
20	0.212	0.31756	0.585458	0.671526
30	0.159	0.37652	0.550858	0.690476
40	0.137	0.33887	0.575238	0.623996
50	0.125	0.28346	0.541948	0.583606
60	0.151	0.31472	0.556748	0.588376
70	0.106	0.36444	0.576418	0.608016
80	0.087	0.36444	0.576248	0.645926
90	0.133	0.29553	0.596038	0.563606
100	0.185	0.26925	0.573778	0.732316
110	0.178	0.26499	0.580238	0.634126
120	0.175	0.27777	0.553778	0.558216
130	0.137	0.26854	0.583358	0.617776
140	0.159	0.27067	0.590658	0.680966
150	0.178	0.28985	0.542818	0.537236
160	0.891	0.27209	0.560898	0.527636
170	0.571	0.32253	0.627818	0.629806
180	0.461	0.28346	0.604428	0.575166
190	0.434	0.35308	0.519028	0.637786
200	0.463	0.31969	0.598288	0.625876
210	0.436	0.43478	0.536738	0.576046
220	0.393	0.39215	0.590448	0.609366
230	0.438	0.29127	0.601588	0.657396
240	0.782	0.32963	0.586978	0.620806
250	0.711	0.31045	0.612158	0.680456
260	0.559	0.4021	0.571868	0.608556
270	0.528	0.36729	0.535968	0.709236
280	0.455	0.27848	0.511688	0.665326
290	0.459	0.27351	0.516338	0.611796
300	0.415	0.31045	0.576908	0.573616
310	0.389	0.22733	0.612428	0.684686
320	0.394	0.25717	0.596138	0.495266
330	0.322	0.22378	0.618158	0.594636
340	0.273	0.29411	0.528148	0.607186
350	0.265	0.249	0.507108	0.630586
360	0.19	0.26286	0.537048	0.660406
370	0.208	0.39215	0.569408	0.722336
380	0.234	0.23373	0.598958	0.664706
390	0.198	0.26072	0.578408	0.611286
400	0.193	0.25788	0.568118	0.656786
410	0.227	0.29269	0.584308	0.672246
420	0.211	0.31969	0.560748	0.673936
430	0.208	0.20531	0.578468	0.628176
440	0.214	0.23089	0.575188	0.574756
450	0.457	0.23444	0.592718	0.562056
460	0.633	0.26072	0.570058	0.608976
470	0.541	0.26072	0.577578	0.668846
480	0.544	0.25859	0.541288	0.631186
490	0.431	0.23231	0.552148	0.607456
500	0.346	0.23231	0.585558	0.672156
510	0.319	0.18116	0.563468	0.581526
520	0.335	0.23373	0.594098	0.692086
530	0.308	0.20886	0.584518	0.632866
540	0.232	0.20389	0.561288	0.706076
550	0.218	0.15345	0.575348	0.505826
560	0.849	0.20247	0.585608	0.704866
570	0.645	0.20389	0.571448	0.735586
580	0.747	0.15558	0.559548	0.579446
590	0.564	0.1705	0.605048	0.628116
600	0.577	0.18471	0.553568	0.627596
610	0.439	0.18045	0.554488	0.625326
620	0.534	0.17405	0.577768	0.508376
630	0.589	0.12361	0.592168	0.631106
640	0.433	0.12432	0.571438	0.456726
650	0.413	0.11935	0.574218	0.582456
660	0.392	0.13782	0.550958	0.578346
670	0.316	0.1364	0.559328	0.604486
680	0.241	0.13143	0.538618	0.637696
690	0.208	0.19608	0.529318	0.690116
700	0.164	0.18116	0.579698	0.587536
710	0.158	0.16198	0.587198	0.643556
720	0.149	0.20744	0.534088	0.618976
730	0.184	0.23231	0.612708	0.645126
740	0.17	0.18897	0.572408	0.591256

## Sheet: Fig2d
Time	cycle	13.0kPa	2.2kPa	1.6kPa
10	0.14	0.21469	0.44978	0.53989
20	0.1	0.17543	0.46034	0.42187
30	0.069	0.18488	0.50881	0.54256
40	0.064	0.19575	0.5246	0.36612
50	0.057	0.14295	0.49311	0.58432
60	0.062	0.17455	0.4874	0.50624
70	0.049	0.21108	0.50095	0.51466
80	0.045	0.23425	0.48569	0.55648
90	0.062	0.22484	0.43069	0.63889
100	0.087	0.16594	0.5095	0.51114
110	0.089	0.18849	0.55195	0.44646
120	0.079	0.16285	0.48727	0.52642
130	0.069	0.1682	0.46282	0.46334
140	0.075	0.14482	0.4703	0.49905
150	0.098	0.15318	0.47909	0.52759
160	0.83	0.13537	0.4698	0.53644
170	0.497	0.16949	0.46457	0.72847
180	0.538	0.15137	0.47253	0.58803
190	0.437	0.16491	0.45599	0.49874
200	0.402	0.14977	0.46139	0.5715
210	0.318	0.2256	0.45357	0.51295
220	0.247	0.20415	0.53778	0.42656
230	0.287	0.16619	0.49657	0.66955
240	0.815	0.15308	0.55139	0.51722
250	0.683	0.15414	0.51214	0.44362
260	0.399	0.19449	0.45598	0.37435
270	0.318	0.18086	0.47638	0.51515
280	0.251	0.12563	0.51125	0.6405
290	0.239	0.15414	0.542	0.50454
300	0.192	0.15266	0.47778	0.51895
310	0.182	0.12837	0.48746	0.59519
320	0.177	0.15014	0.50548	0.57241
330	0.14	0.11965	0.48991	0.70855
340	0.121	0.1587	0.50004	0.56994
350	0.114	0.16471	0.45877	0.55009
360	0.119	0.17906	0.48858	0.45674
370	0.13	0.20793	0.43532	0.42287
380	0.097	0.23641	0.46628	0.50097
390	0.088	0.18411	0.46537	0.52271
400	0.09	0.1682	0.4937	0.48469
410	0.099	0.16778	0.49792	0.58724
420	0.082	0.19731	0.45597	0.4566
430	0.091	0.11961	0.49612	0.51313
440	0.094	0.11574	0.53723	0.64437
450	0.32	0.10451	0.51149	0.50127
460	0.374	0.16301	0.49586	0.59146
470	0.364	0.18518	0.53287	0.47944
480	0.329	0.17478	0.46736	0.50137
490	0.253	0.19535	0.47601	0.62063
500	0.183	0.19443	0.54144	0.45014
510	0.147	0.23549	0.50722	0.42647
520	0.153	0.22318	0.45294	0.55917
530	0.141	0.18854	0.50448	0.48243
540	0.116	0.18488	0.49944	0.38797
550	0.104	0.174	0.48917	0.47722
560	0.746	0.19032	0.55804	0.58707
570	0.766	0.19523	0.54647	0.48068
580	0.888	0.17782	0.48171	0.3714
590	0.684	0.19569	0.55463	0.58403
600	0.527	0.20669	0.47703	0.66331
610	0.437	0.18477	0.46225	0.5794
620	0.411	0.1764	0.48919	0.45383
630	0.313	0.17287	0.52082	0.51536
640	0.227	0.22491	0.46669	0.59833
650	0.191	0.17114	0.51917	0.45019
660	0.19	0.24804	0.52531	0.36202
670	0.151	0.23359	0.47441	0.52265
680	0.129	0.20434	0.50132	0.45868
690	0.128	0.16748	0.5829	0.43068
700	0.121	0.15089	0.48639	0.56421
710	0.116	0.11912	0.44508	0.61826
720	0.117	0.1035	0.52414	0.64126
730	0.113	0.11842	0.47763	0.32792
740	0.077	0.0919	0.48301	0.52674

## Sheet: Fig2e
Time	cycle	13.0kPa	2.2kPa	1.6kPa
10	1.444	0.0621	0	0
20	4.197	0	0	0
30	2.724	0.27772	0	0
40	2.693	0.61161	0	0
50	7.462	0.50067	0	0
60	8.004	0.17565	0	0
70	2.637	0.35129	0	0
80	1.074	0.2239	0	0
90	1.204	0.39763	0	0
100	0.932	0.39763	0	0
110	0.651	0.2239	0	0
120	9.696	0.41658	0	0
130	1.955	0.57253	0	0
140	1.029	0.26347	0	0
150	0.727	0.33442	0	0
160	0	0.3105	0	0
170	1.108	0.3105	0	0
180	1.132	0.96405	0	0
190	0.103	0.63936	0	0
200	4.219	0.39275	0	0
210	1.136	0.50067	0	0
220	0.976	0.13886	0.08782	0
230	0	0.37774	0	0.1242
240	0.92	0.45209	0	0
250	2.121	0.2484	0	0
260	0.626	0.43911	0	0
270	0	0.1863	0	0
280	0	0.4347	0	0
290	0.69	0.5589	0	0.08782
300	0	0.0621	0	0
310	0	0.51209	0	0.0621
320	0.823	0.25604	0	0.0621
330	0.651	0.1863	0	0
340	0	0.17565	0	0
350	0.206	0.0621	0	0
360	0.829	0.08782	0	0
370	0.72	0.1863	0	0
380	0	0.0621	0	0.13886
390	0.626	0.1242	0	0
400	1.113	0.1242	0.3105	0
410	10.187	0	0	0
420	2.454	0	0	0
430	1.529	0.37774	0	0.0621
440	1.256	0.2484	0	0
450	1.455	0.37774	0	0
460	1.399	0.33442	0	0
470	0	0.39275	0	0
480	0.514	0.39275	0	0
490	0	0.5589	0	0
500	0.932	0.47294	0	0
510	0.848	0	0	0
520	6.441	0.58913	0	0
530	1.204	0.74778	0	0
540	0.848	0.4968	0	0.0621
550	0.206	0.3105	0	0
560	0	0.2484	0	0
570	1.108	0.0621	0	0
580	0.926	0	0	0
590	0.412	0.3105	0	0
600	1.094	0.2484	0	0
610	0.412	0.1863	0	0
620	0.617	0	0	0
630	0	0.0621	0	0
640	0.823	0.1863	0	0
650	0.626	0	0	0
660	0.525	0.39275	0.2484	0.2484
670	1.235	0	0	0
680	0.325	0	0	0
690	0.412	0	0	0
700	4.62	0	0	0
710	1.235	0	0.0621	0.0621
720	0	0	0	0
730	0.784	0	0	0
740	0.784	0	0	0.1863

## Sheet: Fig2f FigS25a
angle	13.0kPa-N	13.0kPa-Prob	1min-N	1min-Prob	OE Talin-N	OE Talin-Prob		Time	1min		13.0kPa
0	137	0.625571	27	0.132353	137	0.674877		0	1	0	1	0
36	7	0.0319635	18	0.0882353	7	0.0344828		10	0.55806	0.00285	0.89244	0.01541
72	3	0.0136986	23	0.112745	1	0.00492611		20	0.47328	0.02213	0.85284	0.01804
108	4	0.0182648	16	0.0784314	4	0.0197044		30	0.41095	0.02271	0.83877	0.01817
144	14	0.0639269	19	0.0931373	6	0.0295567		40	0.38281	0.02335	0.83508	0.0191
180	37	0.16895	25	0.122549	32	0.157635		50	0.34525	0.02343	0.83053	0.01983
216	4	0.0182648	23	0.112745	4	0.0197044		60	0.32989	0.02354	0.819	0.01993
252	3	0.0136986	15	0.0735294	2	0.00985222		70	0.32818	0.02393	0.80284	0.02029
288	3	0.0136986	19	0.0931373	8	0.0394089		80	0.29095	0.0243	0.8004	0.02122
324	7	0.0319635	19	0.0931373	2	0.00985222		90	0.28974	0.02519	0.80034	0.02156
								100	0.26002	0.0255	0.79908	0.02161
								110	0.24393	0.02549	0.78064	0.02287
								120	0.22527	0.02549	0.77728	0.02305
								130	0.21451	0.02589	0.77155	0.02315
								140	0.19765	0.02596	0.7701	0.02348
								150	0.18863	0.0262	0.76329	0.0235
								160	0.18827	0.02626	0.7616	0.02396
								170	0.18825	0.02626	0.74627	0.02487
								180	0.18746	0.02627	0.74358	0.02502
								190	0.1867	0.02661	0.74109	0.02509
								200	0.18628	0.02675	0.73968	0.0252
								210	0.17575	0.02677	0.7392	0.02528
								220	0.16492	0.02742	0.72692	0.02578
								230	0.16266	0.02769	0.71927	0.02596
								240	0.14095	0.02794	0.71028	0.0268
								250	0.13948	0.02782	0.70943	0.02687
								260	0.13946	0.02761	0.69964	0.02734
								270	0.12611	0.02766	0.68392	0.0275
								280	0.12087	0.0281	0.68304	0.02786
								290	0.12013	0.02827	0.67389	0.0282
								300	0.11987	0.02855	0.67352	0.02834
								310	0.11976	0.02859	0.66821	0.02853
								320	0.11913	0.02931	0.66626	0.02867
								330	0.11864	0.02933	0.66407	0.0291
								340	0.11782	0.02934	0.65905	0.02934
								350	0.10782	0.0295	0.65817	0.02943
								360	0.10166	0.02958	0.65791	0.02945
								370	0.10146	0.03012	0.65198	0.0302
								380	0.10101	0.03036	0.64993	0.03046
								390	0.09443	0.03042	0.64542	0.03049
								400	0.0799	0.03067	0.64368	0.03049
								410	0.07938	0.03107	0.64085	0.03109
								420	0.07494	0.03144	0.63444	0.0311
								430	0.07277	0.03245	0.6321	0.03133
								440	0.0721	0.03258	0.62715	0.03138
								450	0.06597	0.03264	0.61963	0.03208
								460	0.06497	0.03293	0.61752	0.03244
								470	0.06496	0.03294	0.61125	0.03237
								480	0.06493	0.03297	0.60922	0.03236
								490	0.06265	0.03346	0.60851	0.0327
								500	0.06094	0.03442	0.6016	0.03312
								510	0.06091	0.03463	0.60144	0.03393
								520	0.05991	0.03475	0.5971	0.03405
								530	0.05207	0.03533	0.59154	0.03449
								540	0.04475	0.03597	0.589	0.03482
								550	0.04255	0.03614	0.58791	0.03515
								560	0.04255	0.03631	0.58611	0.03555
								570	0.0416	0.03634	0.58567	0.03562
								580	0.04105	0.03697	0.58561	0.03563
								590	0.03546	0.03736	0.58526	0.03585
								600	0.03383	0.03845	0.585	0.03676
								610	0.03115	0.03956	0.58473	0.03687
								620	0.03076	0.04029	0.58409	0.03729
								630	0.0306	0.04043	0.58376	0.03762
								640	0.03006	0.04091	0.58314	0.03878
								650	0.03005	0.04195	0.58285	0.03879
								660	0.03005	0.04208	0.58099	0.03967
								670	0.02919	0.0428	0.57983	0.03986
								680	0.02899	0.04376	0.57952	0.03997
								690	0.02885	0.04376	0.57913	0.04099
								700	0.02885	0.0431	0.57893	0.04101
								710	0.02691	0.04434	0.57892	0.04098
								720	0.02682	0.04467	0.57891	0.04092

## Sheet: Fig2h
Myosin in cycle	Myosin in Constant	Golgi in cycle	Golci in constant
0.23025	0.7382	1.14186	1.06376
0.30352	0.53984	2.21111	1.32114
0.54187	0.98858	0.86446	0.59874
0.28364	1.14835	0.274	0.50103
0.2184	1.04592	1.94107	0.77464
0.06081	1.08068	0.91776	1.45377
0.50954	0.81056	2.86936	1.97586
0.21635	1.48341	1.56645	1.24845
0.23965	1.0829	2.62413	0.5107
0.20033	0.82214	0.57432	1.05474
0.16633	1.17439	0.86563	1.39063
0.29887	0.30639	0.48183	0.67647
0.30749	0.78781	0.37927	2.218
0.2383	1.16706	0.90817	0.46526
0.35704	0.476	1.75766	1.80435
0.29446	0.65063	1.10678	2.0691
0.22414	0.67915	2.88616	1.6143
0.24026	0.84861	2.686	0.35128
0.32791	0.97099	2.23517	1.7335
0.35072	0.59553	0.41807	1.94713
0.4205	1.15133	1.33538	1.06092
0.29422	0.74923	2.3773	0.27388
0.31036	0.48895	0.1481	1.70366
0.20977	0.99251	0.95414	1.48712
0.36292	1.70553	1.56756	1.59354
0.29411	0.85609	1.40016	1.69586
0.21931	0.20308	3.39463	1.00869
0.51763	1.21263	1.65261	0.90656
0.50721	1.03352	1.86463	1.46391
0.3635	0.97653	1.40875	1.84543
0.158	0.81613	1.12298	1.4253
0.31664	1.27575	1.8731	1.82942
0.30878	1.33372	0.76373	0.91857
0.36458	1.21069	1.7972	1.1996
0.2913	0.53005	1.31494	0.71895
0.41584	0.90443	1.12553	1.12451
0.35765	0.07786	1.44364	1.58322
0.21169	1.46021	0.1355	1.83418
0.41501	1.43604	1.23727	1.78759
0.32345	0.64175	2.02353	0.84598
0.32061	0.75886	1.44813	0.83717
0.10635	0.95591	1.58244	0.52728
0.21226	0.89349	1.33258	0.47376
0.2031	0.91464	1.08536	0.71813
0.3653	1.25598	1.55405	1.15129
0.35366	1.48672	1.98895	1.50514
0.3049	0.63413	2.66489	0.832
0.4462	1.1048	2.36816	0.83945
0.37876	1.1426	2.91522	1.24384
0.50665	0.42217	1.67547	1.01684
0.158	1.20963	2.33334	1.281
0.27196	0.68137	3.82974	1.07652
0.24637	0.53455	1.18456	1.34995
0.35088	0.53724	0.82589	1.44171
0.21604	0.51558	0.02005	0.56023
0.16896	0.74017	1.84139	0.77086
0.26577	0.74448	0.13989	0.11891
0.42066	0.96081	2.13905	1.18985
0.20332	0.55027	1.07282	1.40767
0.35167	0.19332	2.31921	1.49904
0.15604	0.55505	2.88874	1.79656
0.10407	0.69698	1.81427	1.25126
0.38805	0.8748	1.89603	1.08086
0.50745	1.05912	1.94883	0.98958
0.55654	1.03426	2.49966	1.19588
0.32825	0.39087	2.06729	1.11349
0.47083	0.90361	1.43524	1.84103
0.34251	1.09326	1.40403	1.06084
0.27212	0.52559	2.53748	1.61268
0.50641	0.35852	1.00395	1.50533
0.45104	1.19691	2.36735	0.95184
0.16758	1.0695	1.96078	0.79077
0.19312	0.98531	2.35814	1.14302
0.36377	0.62768	2.09939	1.33995
0.41838	0.19541	0.95126	0.98157
0.27131	0.51631	0.80914	1.37265
0.25865	0.61031	0.53606	1.76043
0.31503	0.95124	2.85323	1.39592
0.21775	0.9427	1.947	0.71591
0.24886	0.6633	1.64332	1.88856
0.34947	0.13832	1.95925	0.92001
0.35713	0.87583	0.85662	1.88546
0.38219	0.75793	1.35106	0.48131
0.32441	1.30911	0.65234	1.07125
0.19859	0.73832	2.2981	0.23318
0.39661	1.16071	1.15569	0.47355
0.31149	0.3701	1.25275	1.13283
0.29785	0.7804	1.65823	1.9237
0.31232	1.31608	2.70943	1.6261
0.2554	0.69751	2.02642	1.14404
0.37072	1.46264	1.64704	0.95472
0.46307	0.75819	1.98116	1.40849
0.28865	0.78773	1.58582	1.3869
0.1822	1.336	1.45207	1.10553
0.37719	1.32592	1.58018	0.98323
0.25853	1.55463	2.66852	1.2155
0.23533	0.76662	1.81988	1.01403
0.19756	0.63919	1.18539	1.67587
0.3265	0.36929	1.25903	0.88903
0.2456	1.05777	2.11879	1.13938
0.20593	0.75273	1.43958	1.52561
0.36756	1.50357	0.77023	1.82071
0.53939	1.60261	1.98245	1.18701
0.25513	0.28991	1.18161	1.48827
0.16834	0.79263	2.20664	0.73351
0.18444	1.13284	1.28051	0.86837
0.18642	0.75233	1.51752	0.98058
0.28918	0.9104	1.60631	1.16267
0.39129	1.03348	2.09939	2.06316
0.35263	1.12545	1.18986	1.54653
0.28485	0.82004	3.14072	0.45117
0.39635	0.50134	1.05793	0.83155
0.38137	0.8588	1.66425	1.4617
0.2544	0.76959	2.35615	1.56945
0.37611	0.98013	1.24957	0.85776
0.3362	0.62389	2.24081	0.88619
0.34455	1.00134	2.42169	1.44636
0.26022	0.95386	2.50519	1.24214
0.2778	1.76102	1.16482	1.3649
0.23782	1.09654	0.90859	0.93955
0.13743	1.22451	1.89261	1.33346
0.42679	1.21643	1.08361	0.39004
0.21636	1.45767	0.86446	1.31373
0.24352	0.49422	1.6511	0.76666
0.28837	0.44097	1.21839	0.3332
0.28003	0.73846	2.91246	1.77929
0.19272	1.00474	1.68717	1.3491
0.30501	0.87921	1.01328	0.76003
0.2572	0.8212	0.30589	0.10352
0.40896	0.72944	1.34017	1.14305
0.21088	0.33775	2.89483	0.87985
0.01087	1.08675	2.93349	1.50925
0.32813	0.35969	1.44352	1.28857
0.1634	0.87116	1.92338	1.54704
0.37218	1.04935	1.38823	1.13407
0.25586	0.76455	0.88594	0.80675
0.36703	0.86817	1.61734	1.26326
0.27579	0.51279	2.03621	0.97921
0.25693	1.30193	2.6194	0.29211
0.27672	0.7462	1.41488	0.06699
0.23757	0.9077	1.8945	1.68856
0.09368	0.90255	1.83323	1.59377
0.41939	1.08413	1.20224	1.85309
0.42381	1.94841	1.95524	0.97739
0.15336	0.95585	1.65795	1.18365
0.16784	0.32363	2.16229	1.00572
0.27076	1.33153	1.63459	0.90974
0.3343	1.01059	2.50633	1.64948
0.38326	0.94557	1.45465	1.09382
0.38155	0.51474	0.91851	1.2279
0.30007	0.83065	1.79338	2.15747
0.29968	1.07119	1.75766	1.33312
0.35147	0.73675	1.16287	1.33578
0.16263	1.66735	1.29124	1.50284
0.17271	1.38633	1.19921	0.6868
0.22334	0.72053	0.12287	1.68363
0.11281	0.63855	1.70305	0.94497
0.26119	2.27336	2.57252	0.50939
0.47844	0.8255	0.41768	0.76886
0.31437	1.15269	0.90673	0.17082
0.23705	0.37152	1.55062	1.16292
0.38176	0.07664	0.78777	0.96184
0.36158	1.27933	0.71398	0.60381
0.35	0.12058	2.41243	1.83273
0.07097	1.42616	1.60858	1.3481
0.28465	1.39961	1.21501	1.28713
0.06674	1.51857	2.32962	1.58529
0.25836	0.74329	2.14077	1.93627
0.32792	0.77953	2.54044	1.7616
0.28425	0.41583	1.55748	1.29448
0.25681	1.07267	0.98331	1.1626
0.16225	0.5033	0.84897	0.50704
0.29585	0.86668	0.4381	0.73474
0.25981	0.6122	1.45538	0.92238
0.08241	1.18102	1.68817	1.10084
0.20681	1.17049	1.4757	1.16476
0.33286	0.77438	1.36466	0.71696
0.38176	0.78398	0.74134	0.87621
0.28047	0.88673	2.04056	1.11909
0.29194	0.60619	1.32136	1.22446
0.16211	0.32207	1.92911	0.77992
0.34599	0.50908	2.2645	0.63612
0.28208	1.10186	1.5108	1.00023
0.32634	0.4676	1.85053	0.92965
0.32756	0.76827	1.6088	2.15598
0.0339	0.58633	0.57027	1.17561
0.28277	0.97277	0.38316	1.26318
0.47361	0.09528	0.73312	1.71205
0.35326	0.55435	1.81409	0.95356
0.25053	0.33028	1.55604	1.70516
0.20295	0.83651	1.75115	1.11991
0.3852	0.84252	1.01946	1.49282
0.23572	0.58854	3.42351	1.6373
0.30964	0.80294	2.12527	1.41199
0.36603	1.31939	1.53876	0.70656
0.23237	0.93013	1.86799	0.57051
0.20375	1.52238	1.49784	1.38098
0.2821	0.7738	3.0117	0.97037
0.21261	0.43604	1.41693	1.61732
0.43778	1.55779	1.31641	0.96365
0.39481	1.24987	2.31955	1.62536
0.19098	0.50458	0.89916	0.72066
0.39481	1.24987	2.31955	1.62536
0.19098	0.50458	0.89916	0.72066
0.39481	1.24987	2.31955	1.62536
0.19098	0.50458	0.89916	0.72066
0.39481	1.24987	2.31955	1.62536
0.19098	0.50458	0.89916	0.72066

[truncated: 37 more sheets: Fig3b, Fig3c, Fig3d Fig5d Fig6g FigS17d, Fig3g, Fig3j, Fig3l, Fig4b, Fig4d, Fig5b 5e 6e S26 S32, Fig5c 5f 6f S27 S32, Fig5g, Fig6b, Fig6c, Fig6d, FigS3ab, FigS3cd, FigS4ab, FigS4c, FigS5, FigS7 …]
