# Supplementary material for: Dynamic Rigidity Changes Enable Rapid Cell Migration on Soft Substrates
Source: Research Square preprint supplement (doi:10.21203/rs.3.rs-5225113/v1), 2025-08-19
Supplement: Supplementary file 4 [file eb8b17a8fd02e39e7a3449ab.docx]

**Main Figures (submitted as separate files):**

**Figure 1**

**Figure 2**

**Figure 3**

**Figure 4**

**Figure 5**

**Figure 6**

**Supplementary Movies (submitted as separate files):**

**Supplementary Movie 1**

**Supplementary Movie 2**

**Supplementary Movie 3**

**Supplementary Movie 4**

**Supplementary Movie 5**

**Supplementary Movie 6**

**Supplementary Movie 7**

**Supplementary Movie 8**

**Supplementary Movie 9**

**Supplementary Movie 10**

**Supplementary Movie 11**

**Supplementary Movie 12**

**Supplementary Movie 13**

**Supplementary Movie 14**

**Supplementary Movie 15**

**Supplementary Movie 16**

**Supplementary Movie 17**

**Supplementary Movie 18**

**Supplementary Movie 19**

**Supplementary Movie 20**

**Supplementary Movie 21**

**Supplementary Information (provided within a single PDF document):**

**Table S1**

**Figure S1**

**Figure S2**

**Figure S3**

**Figure S4**

**Figure S5**

**Figure S6**

**Figure S7**

**Figure S8**

**Figure S9**

**Figure S10**

**Figure S11**

**Figure S12**

**Figure S13**

**Figure S14**

**Figure S15**

**Figure S16**

**Figure S17**

**Figure S18**

**Figure S19**

**Figure S20**

**Figure S21**

**Figure S22**

**Figure S23**

**Figure S24**

**Figure S25**

**Figure S26**

**Figure S27**

**Figure S28**

**Figure S29**

**Figure S30**

**Figure S31**

**Figure S32**

**Author Checklist (submitted as a separate file)**

**Source Data (submitted as a separate file)**

**Reporting Summary (submitted as a separate file)**

**Editorial Policy Checklist (submitted as a separate file)**

**BioRender Publication License (submitted as a separate file)**

**Signed Consent for Author Order Change (submitted as a separate file)**
